1 **TITLE: Giant African snail genomes provide insights into molluscan**  
2 **whole-genome duplication and aquatic-terrestrial transition**

3 Conghui Liu<sup>+</sup>, Yuwei Ren<sup>+</sup>, Zaiyuan Li, Qi Hu, Lijuan Yin, Xi Qiao, Yan Zhang,  
4 Longsheng Xing, Yu Xi, Fan Jiang, Sen Wang, Cong Huang, Bo Liu, Hengchao Wang,  
5 Hangwei Liu, Fanghao Wan, Wanqiang Qian\*, Wei Fan\*

6 Guangdong Laboratory of Lingnan Modern Agriculture, Shenzhen ; Genome  
7 Analysis Laboratory of the Ministry of Agriculture and Rural Affairs; Agricultural  
8 Genomics Institute at Shenzhen, Chinese Academy of Agricultural Sciences,  
9 Shenzhen, 518120, China.

10 The authors with symbol “<sup>+</sup>” contributed equally: Conghui Liu, Yuwei Ren; the  
11 authors with symbol “\*” represented corresponding authors: Wanqiang Qian, Wei  
12 Fan.

13 Email: qianwanqiang@caas.cn; fanwei@caas.cn.

14

15

16

17

18

19

20

21

22 **Abstract**

23 **Whole-genome duplication (WGD) has been observed across a wide variety**  
24 **of eukaryotic groups, contributing to evolutionary diversity and environmental**  
25 **adaptability. Mollusks are the second largest group of animals, and are among**  
26 **the organisms that have successfully adapted to the nonmarine realm through**  
27 **aquatic-terrestrial (A-T) transition, and no comprehensive research on WGD has**  
28 **been reported in this group. To explore WGD and the A-T transition in Mollusca,**  
29 **we assembled a chromosome-level reference genome for the giant African snail**  
30 ***Achatina immaculata*, a global invasive species, and compared the genomes of**  
31 **two giant African snails (*A. immaculata* and *Achatina fulica*) to the other**  
32 **available mollusk genomes. The chromosome-level macrosynteny, colinearity**  
33 **blocks, Ks peak and Hox gene clusters collectively suggested the occurrence of a**  
34 **WGD event shared by *A. immaculata* and *A. fulica*. The estimated timing of this**  
35 **WGD event (~70 MYA) was close to the speciation age of the**  
36 **Sigmurethra-Orthurethra (within Stylommatophora) lineage and the**  
37 **Cretaceous-Tertiary (K-T) mass extinction, indicating that the WGD reported**  
38 **herein may have been a common event shared by all Sigmurethra-Orthurethra**  
39 **species and could have conferred ecological adaptability and genomic plasticity**  
40 **allowing the survival of the K-T extinction. Based on macrosynteny, we deduced**  
41 **an ancestral karyotype containing 8 conserved clusters for the**  
42 **Gastropoda-Bivalvia lineage. To reveal the mechanism of WGD in shaping**  
43 **adaptability to terrestrial ecosystems, we investigated gene families related to the**

44 **respiration, aestivation and immune defense of giant African snails. Several**  
45 **mucus-related gene families expanded early in the Stylommatophora lineage,**  
46 **functioning in water retention, immune defense and wound healing. The**  
47 **hemocyanins, PCK and FBP families were doubled and retained after WGD,**  
48 **enhancing the capacity for gas exchange and glucose homeostasis in aestivation.**  
49 **After the WGD, zinc metalloproteinase genes were highly tandemly duplicated to**  
50 **protect tissue against ROS damage. This evidence collectively suggests that**  
51 **although the WGD may not have been the direct driver of the A-T transition, it**  
52 **provided an important legacy for the terrestrial adaptation of the giant African**  
53 **snail.**

#### 54 **Introduction**

55 Whole-genome duplication (WGD) is proposed to be a key evolutionary event  
56 driving phenotypic complexity, functional novelty, and ecological adaptation<sup>1,2</sup>. With  
57 the progress of high-throughput sequencing technologies, almost all fundamental  
58 lineages of land plants have been characterized as having undergone WGD, while far  
59 fewer WGDs among animal lineages have been reported, especially in invertebrate<sup>3,4</sup>.  
60 Based on chromosome counts and genome size, WGD events have been speculated to  
61 have occurred in mollusks, the second largest animal group, which have survived  
62 major extinction events and become some of the most successful conquerors of  
63 marine, freshwater and terrestrial environments<sup>5,6</sup>. Giant African snails, a group of  
64 species within Achatinidae possessing unusually large body sizes, have evolved from

65 aquatic ancestors and achieved a pulmonate terrestriality through an aquatic-terrestrial  
66 (A-T) transition <sup>7</sup>. Because of their remarkable ecological adaptability, some members  
67 of the giant African snails are considered global invasive species, causing serious  
68 damage to agriculture and households <sup>8</sup>. The success of their colonization of terrestrial  
69 ecosystems and adaptation to diverse environments suggests that giant African snails  
70 possess advanced genetic plasticity and evolutionary novelties, although the key  
71 drivers and underlying mechanisms remain poorly understood.

72 In contrast to plants, only a few ancient WGDs have been well documented in  
73 animals, because polyploidy is usually an evolutionary dead end, resulting from  
74 associated meiotic difficulties <sup>9,10</sup>. In vertebrates, several ancient WGD events that  
75 occurred at the origin of vertebrates and teleost fishes have been proposed to have  
76 shaped genetic diversity and adaptive radiation <sup>11,12</sup>. In animals other than vertebrates,  
77 less conclusive evidence of ancient WGD events has been reported as there is a  
78 deficiency of continuous high-quality genome data. Nevertheless, there are several  
79 known cases of large-scale genome duplication in groups, such as rotifers,  
80 chelicerates and insects. The genome of bdelloid rotifers is tetraploid, and its scaffolds  
81 are rearranged during asexual reproduction <sup>13</sup>. A possible ancestral WGD in  
82 chelicerates has been identified in horseshoe crab and was dated to at least 135  
83 million years ago (MYA) through the phylogenetic analysis of Hox genes <sup>14</sup>, and  
84 subsequent surveys in chelicerates revealed that the spider and scorpion lineages  
85 underwent another separate WGD before 430 MYA <sup>15</sup>. Because of the fragmental  
86 assembly and uncertain accuracy of traditional analysis methods, the validation of

87 WGD in invertebrates remains controversial. Surprisingly, Li et al. reported 18  
88 ancient WGDs during the evolution of insects in a recent paper, while another  
89 macrosyteny analysis in lepidopterans showed that the gene-tree-based and Ks-based  
90 detection of WGD adopted by Li are unreliable, and suggested that WGD events  
91 should be verified by chromosome-scale genome assembly and macrosyteny  
92 analysis <sup>16,17</sup>.

93       Regarding the A-T transition, the conquest of land by organisms that evolved  
94 from aquatic ancestors represents one of the most astonishing events in the history of  
95 life on Earth <sup>18</sup>. The dramatic environmental changes from homogeneous water  
96 habitat to the heterogenous land environment brought about a significant revolution in  
97 species evolution, leading to radiation diversity and life complexity <sup>19,20</sup>. This step  
98 was achieved in multiple phyla independently via a set of adaptations such as water  
99 balance, air breathing, nitrogen excretion, neural-immune system interactions, and  
100 certain behaviors <sup>21</sup>. Within Mollusca, the clade Pulmonata includes several lineages  
101 that invaded the terrestrial zone and non-aquatic ecosystems, especially the  
102 Stylommatophora <sup>22</sup>. The giant African snail within Stylommatophora is a  
103 representative of the land snails that has also developed fundamental machinery and  
104 behaviors such as a pulmonate lung, complex immune system, mucus production, and  
105 aestivation, making it highly adapted to the terrestrial environment <sup>22-24</sup>. Several  
106 reports on amphibious species have shown that the expansion and positive selection of  
107 genes related to innate immunity, nitrogen excretion, hormonal regulation and  
108 pulmonary surfactants were closely connected to the A-T transition <sup>25</sup>, although the

109 genomic features and evolutionary characteristics of terrestrial invertebrates are still  
110 poorly described. Studies of the giant African snail, a promising model for terrestrial  
111 mollusks, will facilitate the elucidation of invertebrate A-T transition.

112 Mollusca is the second largest animal phylum constituting 7% of living animals  
113 on Earth <sup>26</sup>, and comprises numerous species of evolutionary and economic  
114 importance <sup>27,28</sup>. However, the available genomic resources for Mollusca are still quite  
115 insufficient in comparison with those for other large phyla such as Arthropoda and  
116 Nematoda <sup>29,30</sup>. The genomes of aquatic mollusks such as California sea hare <sup>31</sup>,  
117 Pacific oyster <sup>32</sup>, pearl oyster <sup>33,34</sup>, owl limpet <sup>35</sup>, California two-spot octopus <sup>36</sup>,  
118 golden mussel <sup>37</sup>, *Biomphalaria glabrata* <sup>38</sup>, and golden apple snail <sup>39</sup> have been  
119 sequenced, whereas few terrestrial species in Mollusca have well-documented  
120 genomic information. Recently, the genomic data of the invasive land snail *A. fulica*  
121 were released, but without in-depth studies of related biological issues <sup>40</sup>. To address  
122 the genetic and evolutionary characteristics of terrestrial mollusks, we report the  
123 genome of another giant African snail with a larger body size and greater invasiveness  
124 (Fig. 1a, b and c) <sup>41</sup>, and provide insights into the molluscan WGD, A-T transition,  
125 and invasion mechanisms, through comparative genomic analysis between the two  
126 giant African snails and other closely related mollusks.

127

128 **Results**

129 **The *A. immaculata* genome provides a better assembly and annotation for giant**

130 **African snails**

131 We generated 200 Gb (121 ×) of PacBio SMRT raw reads with an average read  
132 length of 14 kb, and 145 Gb (82 ×) of Illumina HiSeq paired-end reads using DNA  
133 extracted from a single adult of *A. immaculata* (Supplementary Table 1). After quality  
134 filtering, 199 Gb (120 ×) of clean PacBio SMRT reads were corrected with Canu<sup>42</sup>,  
135 assembled with wtdbg2<sup>43</sup>, and polished with pilon<sup>44</sup>, resulting in an assembly of 563  
136 raw contigs with a total length of 1,653 Mb and an N50 length of 3.80 Mb. Based on  
137 the Hi-C data, 1,648 Mb (99.7%) of final contigs were anchored and arranged into 31  
138 linkage groups, each corresponding to a natural chromosome (Fig. 1d, Supplementary  
139 Fig. 1), where the longest was 111.19 Mb and the shortest 34.32 Mb. According to an  
140 estimated genome size of 1.75 Gb based on the distribution of the k-mer frequency<sup>32</sup>  
141 (Supplementary Fig. 2), ~95% of the *A. immaculata* genome was assembled. To  
142 further confirm the accuracy and completeness of the assembly, we mapped the  
143 Illumina reads to the assembled reference genome. Significantly, 99.11% of the  
144 genome-derived reads could be aligned to the reference genome with a coverage rate  
145 of 96.50%, suggesting no obvious bias in sequencing and assembly. The high-quality  
146 reference genome provides a good foundation for gene annotation.

147 Protein-coding genes were predicted in the reference genome by using EVM,  
148 integrating *de novo* prediction, transcriptome and homology data (Supplementary

149 Table 2). In total, 28,702 gene models were predicted as the reference gene set, with  
150 coding regions spanning ~39.1 Mb (2.37%) of the genome (Supplementary Table 3  
151 and 4). The distribution of CDS length in *A. immaculata* was similar to that in closely  
152 related species (Supplementary Fig. 3 and 4). Overall, 87.5% of the reference genes  
153 were supported by transcriptome data, and 96.27% of the eukaryotic core genes from  
154 OrthoDB (<http://www.orthodb.org/>) were identified in the reference gene set by  
155 BUSCO. These results were comparable to those obtained from other published  
156 molluscan genomes (Supplementary Table 4). In the functional annotation, a total of  
157 26,616 (92.73%) reference genes were annotated according to at least one functional  
158 database (Supplementary Fig. 5).

159 The quality of this assembly is much better than that of other molluscan genomes  
160 published thus far (Supplementary Table 4). In particular, the coverage rate and  
161 sequence continuity were greatly improved compared with the most recent published  
162 *A. fulica* genome. The estimated genome size was 2.12 Gb, and the *A. fulica* genome  
163 was assembled into 1.86 Gb. The coverage rate of the *A. immaculata* genome (95%)  
164 was 8% higher than that of *A. fulica* (87%). The N50 and N90 lengths of the *A.*  
165 *immaculata* contigs were increased by 5.3 times and 4.9 times, respectively. With  
166 better assembly quality, ~5000 additional gene models were annotated in *A.*  
167 *immaculata*, and the BUSCO rate was improved from 93% (*A. fulica*) to 96% (*A.*  
168 *immaculata*). The high quality of the assembly and annotation of *A. immaculata*  
169 provide a better resource for research on giant African snails.



## 170 **Signs of adaptive evolution in giant African snails**

171 To gain insights into the evolution of giant African snails (*A. immaculata* and *A.*  
172 *fulica*), a total of 292,034 reference genes from ten molluscan genomes (Fig. 2) were  
173 clustered into 17,949 orthologous groups (OGs) containing at least two genes each.  
174 Then, a phylogenetic tree was built based on 229 high-confidence single-copy  
175 orthologous genes with RAxML<sup>45</sup> and the divergence time was estimated using R8S  
176<sup>46</sup>. The results showed that *A. immaculata* diverged from *A. fulica* 21 million years  
177 ago (MYA), from *B. glabrata* (Panpulmonata) 174 MYA, from *A. californica*  
178 (Euopisthobranchia) 205 MYA, and from *P. canaliculata* (Caenogastropoda) 416  
179 MYA (Fig. 2a). Through CAFE analysis, we identified 2225 expanded OGs in giant  
180 African snails (both *A. immaculata* and *A. fulica*). The functions of these OGs are  
181 mainly related to signal transduction; the endocrine, immune and nervous systems;  
182 longevity regulation and reproduction (Supplementary Fig. 6). Additionally, 836 OGs  
183 were found exclusively in the lineage of giant African snails, which mainly functioned  
184 in neurohormonal regulation and mucus synthesis and included such as acetylcholine  
185 receptor, pannexin, tenascin, adrenocorticotrophic hormone receptor, neuropeptide  
186 receptor, 5-hydroxytryptamine receptor, mucin, heparan sulfate glucosamine  
187 3-O-sulfotransferase and proteophosphoglycan genes (Fig. 2b, Source Data file). This  
188 evidence suggests that the expanded and lineage-specific OGs may play important  
189 roles in the adaptation and invasion of giant African snails.

190 This high-quality genome assembly enables a comprehensive analysis of  
191 transposable elements (TEs), which play multiple roles in driving genome evolution

192 in eukaryotes <sup>47</sup>. In total, we identified 954 Mb of repetitive sequences in the  
193 assembled *A. immaculata* genome and 1,366 Mb in *A. fulica* (Fig. 2c). Next, we  
194 analyzed the divergence rate of each class of TE among the available molluscan  
195 genomes. Notably, the TE class of DNA transposons showed a specific peak at a  
196 divergence rate of 4~6% for four invasive species, *A. immaculata*, *A. fulica*, *P.*  
197 *canaliculata* and *C. gigas* (Fig. 2d), indicating a recent explosion of DNA transposons.  
198 We identified 9,291 genes in region that contained DNA transposons distributed  
199 within the specific divergence peak. Based on KEGG annotation, these genes were  
200 mainly enriched in signal transduction; the endocrine, immune and nervous systems  
201 and reproduction (Supplementary Fig. 7). TEs are powerful facilitators of evolution  
202 that generate the “evolutionary potential” to introduce small adaptive changes within  
203 a lineage, and the importance of TEs in stress responses and adaptation has been  
204 reported in numerous studies <sup>48,49</sup>. The recent explosion of DNA TEs in giant African  
205 snails could have played important roles in promoting their potential plasticity in  
206 stress adaptation.

## 207 **Whole genome duplication in the Sigmurethra-Orthurethra branch**

208 Whole-genome duplication (WGD) has rarely been reported in animals,  
209 especially in invertebrates, although there is growing suspicions of paleopolyploidy in  
210 mollusks based largely on genome sizes and chromosome counts <sup>6</sup>. With  
211 chromosome-level assemblies, we searched for macrosynteny based on homologous  
212 gene pairs among four molluscan genomes, from *A. immaculata*, *A. fulica*, *P.*

213 *canaliculata* and *P. fucata*. Our chromosome-level macrosynteny revealed a WGD  
214 event shared by two giant African snails, *A. immaculata* and *A. fulica*. The 31  
215 chromosomes of *A. immaculata* could be divided into 14 groups with the preservation  
216 of correspondence (Fig. 3a, Supplementary Fig. 8), and the same situation was found  
217 in *A. fulica* (Fig. 3b, Supplementary Fig. 8). In *A. immaculata*, 2092 homologous gene  
218 pairs with mutual best BLASTP hits were located on the corresponding chromosomes,  
219 and this number was 2364 for *A. fulica* (Supplementary Table 5). The comparison of  
220 the giant African snails, *P. canaliculata* (n = 14) and *P. fucata* (n = 14) revealed that  
221 the karyotype doubled in the lineage leading to giant African snails (Fig. 3c, d and e).  
222 The chromosomes of *A. immaculata* and *A. fulica* showed a 1 to 1 corresponding  
223 relationship (Fig. 3c, Supplementary Fig. 8), while most chromosomes from *P.*  
224 *canaliculata* (Fig. 3d, Supplementary Fig. 8) and *P. fucata* (Fig. 3d, Supplementary  
225 Fig. 8) shared macrosynteny with 2 corresponding chromosomes from giant African  
226 snails. The colinearity blocks identified by MCScanX based on BLASTP hits in  
227 corresponding chromosome groups, also suggested that WGD events had occurred in  
228 two giant African snails (Supplementary Fig. 9 and 10). In the gene age distribution  
229 plot of homologous gene pairs, a specific Ks peak shared by *A. immaculata* and *A.*  
230 *fulica* was observed, which was consistent with WGD. The duplication of Hox gene  
231 clusters was powerful clue leading to the discovery of ancient WGDs in vertebrates<sup>50</sup>,  
232 so we further compared the giant African snails' genomes to those with a single Hox  
233 cluster and no evidence of WGD. Duplicated Hox gene clusters with specific  
234 rearrangements were found in two giant African snail genomes. In conclusion, the

235 macrosynteny, colinearity blocks, Ks peak and Hox gene clusters collectively  
236 suggested that a WGD event occurred before the speciation of giant African snails.

237       The timing of WGD events has been reported to show a significant correlation  
238 with specific geological and global climatic change <sup>51</sup>. According to the gene age  
239 distribution of homologous gene pairs and the divergence time of *B. glabrata* and giant  
240 African snails (~174 MYA), we deduced that the timing of the WGD event was ~70  
241 MYA. An earlier estimation suggested the occurrence of a WGD event at the  
242 Sigmurethra-Orthurethra branch within Stylommatophora by comparison of  
243 chromosome numbers among closely related mollusks <sup>6</sup>. The speciation age of the  
244 Sigmurethra-Orthurethra branch was reported to be 65 MYA, which was largely in  
245 consistent with our deduced timing, indicating that the WGD reported here was a  
246 common event shared by all Sigmurethra and Orthurethra species. The timing of the  
247 WGD of the Sigmurethra-Orthurethra branch was also close to Cretaceous-Tertiary  
248 (K-T) mass extinction (~66 MYA), in which global climate change caused the  
249 extinction of 60-70% of all plant and animal life, including most mollusks <sup>52</sup>. In plants,  
250 the K-T mass extinction is considered a shared common causal factor in the  
251 genome-wide doubling of diverse angiosperm lineages <sup>53</sup>. It has also been previously  
252 suggested that polyploidization in animals is correlated with periods of unstable  
253 environments <sup>1</sup>. The WGD of the Sigmurethra-Orthurethra branch is expected to have  
254 provided ecological adaptability and genome plasticity and allowed these taxa to  
255 survive the K-T mass extinction.

256       As the terrestrial area expanded during the K-T mass extinction due to

257 Maastrichtian sea-level regression <sup>54</sup>, the WGD is expected to have promoted the  
258 adaptability of land snails to terrestrial ecosystems and speciation diversity. The  
259 functions of WGD-derived homologous gene pairs were significantly enriched in  
260 biological regulation, signal transduction, energy generation and the response to  
261 stimulus (Supplementary Fig. 11). These functions are closely related to terrestrial  
262 living, indicating that the retained WGD-associated genes increased the terrestrial  
263 ecological tolerance of giant African snails.

264 The chromosome-level assembly of *A. immaculata*, *A. fulica*, *P. canaliculata* and  
265 *P. fucata*, allowed us to infer karyotype evolution within the clade of  
266 Gastropoda-Bivalvia based on macrosynteny. Our results indicated a monoploid  
267 chromosome number of  $n=8$  for the root of the Gastropoda-Bivalvia lineage. This  
268 deduced chromosome number was consistent with that of Patellogastropoda ( $n=8\sim 9$ )  
269 <sup>55</sup>, which has been reported to exhibit monophyly in the Gastropoda-Bivalvia lineage  
270 and to present preserved ancestral characters <sup>56</sup>. During subsequent speciation, 6  
271 breaks in the lineages of Gastropoda ( $n=14$ ) and *P. fucata* ( $n=14$ ) were observed at  
272 different locations. In the Gastropoda clade, Stylommatophora possessed 17  
273 chromosomes, with fusion of chr4 and chr13 of Gastropoda, and showed 4 breaks in  
274 chr5 ,chr6 ,chr7 and chr8 of Gastropoda, while *P. canaliculata* retained the monoploid  
275 chromosome karyotype of Gastropoda ( $n=14$ ). The WGD in the lineage of the  
276 Sigmurethra-Orthurethra branch doubled the chromosome count ( $n=17+17$ ). After  
277 WGD, three fusions (chr6-chr15, chr8-chr16 and chr10-chr17 of Stylommatophora)  
278 resulted in the 31 chromosomes of the Sigmurethra-Orthurethra branch ( $n=17+14$ )

279 (Fig. 4). In the lineage of *A. immaculata* and *A. fulica*, a chromosome number  $n = 31$   
280 has remained since their speciation in 21 MYA. The demonstration of chromosome  
281 duplications, fusions and breaks provides insights into the ancestral karyotype and the  
282 mechanism of karyotype evolution in Gastropoda-Bivalvia.

283 **Expansion of hemocyanins and zinc metalloproteinases improves terrestrial**  
284 **respiratory function**

285 The innovation of respiratory gas exchange is the signature of the  
286 aquatic-to-terrestrial transition, which was one of the most conspicuous evolutionary  
287 events to have occurred on Earth <sup>57</sup>. The evolution of the oxygen transportation  
288 system allowed land snails to utilize O<sub>2</sub> from air far more efficiently than aquatic  
289 mollusks <sup>58</sup>. Additionally, an advanced system is needed to eliminate the  
290 accompanying oxidative stress to maintain O<sub>2</sub> homeostasis. However, the underlying  
291 mechanisms of O<sub>2</sub> transport and antioxidation are less well understood.

292 O<sub>2</sub> transport in most members of Gastropoda and Cephalopoda is dependent on  
293 hemocyanin <sup>59</sup>. Based on orthologous and phylogenetic analysis, hemocyanin genes  
294 were observed in six species of Gastropoda and Cephalopoda, which was consistent  
295 with previous reports <sup>59,60</sup>. Notably, there are 4 hemocyanin genes in both *A.*  
296 *immaculata* and *A. fulica*, which is twice as many as in any other Gastropoda species  
297 (Fig. 5a). Moreover, the four homologous genes of *A. immaculata* and *A. fulica* are  
298 located on two chromosomes that derived from WGD, whereas those of other species  
299 without WGD were only located in one chromosome or scaffold (Fig. 5b,

300 Supplementary Fig. 12 and 13). Thus, the doubling of the hemocyanin gene number  
301 through WGD may have increased the O<sub>2</sub> transport ability of giant African snails to  
302 adapt to land living.

303 Reactive oxygen species (ROS) are generated during O<sub>2</sub> metabolism, and  
304 excessive ROS cause oxidative stress and trigger inflammation<sup>61</sup>. However,  
305 antioxidant enzymes protect the host from excess oxidative damage. Superoxide  
306 dismutase (SOD), acid phosphatase (AP) and glutathione S transferase (GST) genes  
307 were identified in giant African snails, with gene numbers comparable to those of  
308 other molluscan species (Supplementary Table 6). In addition to antioxidant enzymes,  
309 metalloproteinases have the ability to hydrolyze fibronectin to reduce the injuries  
310 caused by ROS<sup>62,63</sup>. The number of zinc metalloproteinase genes in both giant  
311 African snails was largely expanded, to 11 in *A.immaculata* and 9 in *A. fulica*,  
312 compared to only 1 or 2 in other species (Fig. 5c, Supplementary Fig. 14 and 15).  
313 Importantly, the zinc metalloproteinase genes of the two species were located in two  
314 syntenic clusters on homologous chromosomes, while no homologous genes were  
315 found on the corresponding duplicated chromosomes resulting from WGD. The  
316 finding that the same location pattern was shared by the two species indicates that  
317 these genes were tandemly duplicated after the WGD event but before the  
318 specification of *A.immaculata* and *A. fulica*. Furthermore, the expression levels of all  
319 zinc metalloproteinases in the hepatopancreas and blood were higher than those in  
320 other tissues, which was consistent with the importance of the antioxidative function  
321 of these two tissues. Therefore, the expansion of zinc metalloproteinases after WGD

322 might have played important roles in the defense of giant African snails against the  
323 damage resulting from oxidative stress and inflammation.

#### 324 **Glucose homeostasis and ureagenesis benefit survival in aestivation**

325 Aestivation in land animals is a special long-term torpid state that occurs in  
326 response to the extreme conditions of summer, such as desiccation, high temperature  
327 and starvation<sup>64</sup>. Terrestrial mollusks originating from aquatic ancestors, developed  
328 aestivation as a strategy for surviving drastic environmental changes on land. During  
329 aestivation, giant African snails seal their shell aperture with epiphragma, and their  
330 body remains within the solid shell for several months<sup>24</sup>. During this long period,  
331 these snails are isolated from feeding and excretion, but their blood sugar level and  
332 toxic nitrogenous waste are maintained within a normal range. However, how the  
333 snails regulate blood glucose homeostasis and eliminate toxins during aestivation is  
334 still poorly understood.

335 Without sugar intake during aestivation, blood glucose homeostasis is mainly  
336 achieved via the exploitation of endogenous resources and the reduction of energy  
337 expenditure<sup>65</sup>. Regarding endogenous resources, glycogen is used initially, after  
338 which some portion of the carbohydrate skeleton associated with protein metabolism  
339 is primarily employed to produce blood glucose through gluconeogenesis<sup>65</sup>. In this  
340 study, we analyzed the expression level changes of two rate-limiting gluconeogenic  
341 enzymes phosphoenolpyruvate carboxykinase (PCK, EC:4.1.1.32) and fructose-1,6 -  
342 bisphosphatase (FBP, EC:3.1.3.11). Both enzymes are encoded by two homologous



343 genes derived from WGD, and the expression level of one homologous gene is  
344 significantly increased in aestivation (negative binomial generalized log-linear model,  
345  $p < 0.01$ ; Supplementary Table 7 and 8), while the other displays relatively constant  
346 expression. On the other hand, the consumption of glucose through the tricarboxylic  
347 acid (TCA) cycle is minimized in aestivation<sup>66</sup>. Several important enzymes are  
348 involved in the TCA, such as citrate synthase (EC:2.3.3.1), and malate dehydrogenase  
349 (EC:1.1.1.37) (Fig. 6a)<sup>67</sup>. Citrate synthase is encoded by two homologous genes  
350 derived from WGD, where one of the homologous genes is significantly  
351 downregulated (negative binomial generalized log-linear model,  $p < 0.01$ ;  
352 Supplementary Table 7 and 8), while the other gene remains stable. The gene  
353 encoding malate dehydrogenase also presented significantly downregulated  
354 expression. This evidence indicates that blood glucose homeostasis during aestivation  
355 is achieved via both the upregulation of gluconeogenesis and downregulation of the  
356 TCA cycle.

357 The oxidative deamination of amino acids generates toxic ammonium ( $\text{NH}_3$ ,  
358  $\text{NH}_4^+$ ), which can cause immunosuppression and neurotoxic effects<sup>68,69</sup>. In a normal  
359 state, giant African snails mainly convert ammonium into uric acid and excrete it out  
360 of their body through the urine, while during aestivation, they convert ammonium into  
361 urea and store it in their body<sup>24,70</sup>. The accumulation of nontoxic urea during  
362 aestivation has been proposed to play a role in the detoxification of nitrogenous  
363 substances, the reduction of evaporative water loss, and the reutilization of nitrogen  
364 resources<sup>65</sup>. In this study, we analyzed the expression profiles of three important

365 enzymes involved in the urea cycle, including carbamoyl phosphate synthetase (CPS,  
366 EC:6.3.5.5), argininosuccinate synthetase (ASS, EC:6.3.4.5), and arginase (EC:3.5.3.1)  
367 <sup>71</sup>. All of the genes encoding these enzymes were significantly upregulated in the  
368 aestivation group compared with the normal group (Fig. 6b), providing insight into to  
369 the mechanism of the transformation of ammonia into urea during the aestivation of  
370 giant African snails.

### 371 **Expanded mucus-related gene families reinforce immune defense**

372 Molluscan immune defense has drawn increasing attention because of its  
373 economic and evolutionary importance <sup>5,72</sup>. As one of the most successful colonizers  
374 of terrestrial environments within Mollusca, giant African snails are remarkably  
375 adaptive and may possess advanced molecular mechanisms for host-defense against  
376 biotic and abiotic stresses <sup>73</sup>. Although giant African snails lack the canonical  
377 vertebrate immunoglobulin, they have developed diverse repertoires of receptors,  
378 regulators, and effectors <sup>23</sup>. To investigate the genes and pathways involved in  
379 immune and stress responses, we characterized the immune system on the basis of the  
380 genome of *A. immaculata*, including pattern recognition receptors, soluble factors,  
381 and mucus-related gene families (Fig. 7a, Supplementary Table 9). The transcriptomes  
382 of the hemocytes after different stimuli (lipopolysaccharide/LPS, peptidoglycan/PGN,  
383 poly (I:C)/IC and  $\beta$ -glucan/GLU) were also analyzed to address the potential roles of  
384 these genes (Supplementary Fig. 16).

385 The mucus of giant African snails is mainly composed of glycosaminoglycans

386 and glycoproteins, and its antimicrobial properties were first reported in the 1980s<sup>74</sup>.  
387 In the *A. immaculata* genome, we identified 11 heparan sulfate glucosamine  
388 3-O-sulfotransferases (OSTs) functioning in glycosaminoglycan synthesis and 99  
389 mucins that encode the major glycoprotein in mucus. OST genes were found to be  
390 expanded in Panpulmonata (10 in *A. immaculata*, 11 in *A. fulica*, 10 in *B. glabrata*)  
391 and Cephalopoda (13 in *O. bimaculoides*), in which they were two times more  
392 abundant than in other mollusks (Supplementary Table 10). The expansion of OSTs in  
393 Panpulmonata occurred in subfamilies OST-1 and OST-3B (Fig. 7b). Acharan sulfate,  
394 a product of OST, is a primary constituent of mucus, and the expansion of the OSTs  
395 was therefore closely related to the abundant surface mucus. The increased expression  
396 levels of OSTs observed after LPS stimulus suggest a possible immune role in the  
397 response to Gram-negative bacteria. The mucin genes were also found to be expanded  
398 on the Stylommatophora branch (99 for *A. immaculate*, 71 for *A. fulica*), showing a  
399 number approximately three times greater than in other mollusks, indicating that the  
400 mucus of Stylommatophora contains more mucin proteins to defend against  
401 microorganism infection (Supplementary Fig. 17, Supplementary Table 10). Increased  
402 expression patterns of mucins were mainly detected in the LPS, IC and GLU groups,  
403 implying their immune roles against Gram-negative bacteria, viruses and fungi,  
404 respectively.

405 A total of 34 mucins from 19 OGs and 3 OSTs from 2 OGs were found  
406 exclusively on the Stylommatophora branch (Source Data file). Their homologous  
407 pseudogenes were located within the corresponding duplicated chromosomes,

408 indicating that these genes were generated before WGD, doubled in number through  
409 WGD, and transformed into pseudogenes after WGD (Supplementary Table 11 and  
410 12). In addition to their roles in immunity, functions of the mucins and OSTs in  
411 wound healing, locomotion and other terrestrial-related processes were observed,  
412 indicating that their expansions before WGD may have played important roles in the  
413 A-T transition.

#### 414 **Discussion**

415 WGD provides evolutionary novelties that increase environmental adaptation and  
416 species diversity, although this process is regarded as rare in animals because it is  
417 hampered by sex determination <sup>75</sup>. As one of the best-known simultaneous  
418 hermaphrodites <sup>76</sup>, the giant African snail possesses the ability to undergo  
419 autofecundation under certain circumstances, thereby overcoming the evolutionary  
420 dead end resulting from WGD. Based on two high-quality assemblies from giant  
421 African snails, we report a high-credibility WGD on the Sigmurethra-Orthurethra  
422 branch (Order: Stylommatophora) with collective evidence including macrosynteny  
423 data, colinearity blocks, the gene-age distribution and Hox gene clusters. In particular,  
424 chromosome-level macrosynteny was employed for WGD identification, which was  
425 highly recommended in a recent paper to avoid possible false-positive results <sup>17</sup>. To  
426 the best of our knowledge, this WGD is the first to be reported in Mollusca and the  
427 first to be reported in invertebrates based on chromosome-level macrosynteny. In  
428 contrast to the two WGDs found in chelicerates (~135 and ~430 MYA), this

429 molluscan WGD was a relatively more recent event with an estimated timing of ~70  
430 MYA. In contrast to ancient WGDs, the identification of this recent event will help to  
431 reveal the adaptive mechanisms and consequences of WGD, especially regarding  
432 subgenome divergence, providing more traceable genomic clues <sup>77</sup>. In most cases,  
433 WGD occurs only under remarkably uncommon circumstances and provides a driving  
434 force during subsequent evolution. As an example, the WGDs identified in a cluster  
435 of angiosperm plants share a common causal factor corresponding with the K-T mass  
436 extinction <sup>78</sup>. The timing of the WGD that occurred in chelicerates at ~430 MYA  
437 and that in *Sigmurethra-Orthurethra* at ~70 MYA is close to the Ordovician-Silurian  
438 (O-S) extinction and the K-T mass extinction, respectively, indicating that the  
439 invertebrate WGD was also connected to mass extinction events. Furthermore, it has  
440 been reported that WGD is followed by a substantial increase in morphological  
441 complexity and species numbers <sup>2</sup>. Therefore, the species richness and wide ranging  
442 adaptations of invertebrates imply that more undiscovered WGDs exist in this clade  
443 and might be revealed as the available genomic resources increases.

444 The A-T transition from water-living to land-living was a milestone in the  
445 evolutionary history on Earth <sup>20</sup>. The *Stylommatophora* lineage, which originated  
446 from a marine ancestor, and breaths through permanently air-filled lungs  
447 successfully completed terrestrial adaptation approximately 100~150 MYA <sup>79</sup>. With  
448 all the associated anatomical and physiological changes required by terrestrial living  
449 <sup>80</sup>, *Stylommatophora* is considered to provide good study material for the  
450 investigation of the A-T transition. The WGD event and sea-level regression that

451 occurred during the K-T boundary are expected to have resulted in greater  
452 adaptability to terrestrial ecosystems<sup>54</sup>. To reveal the mechanism underlying the A-T  
453 transition and the influence of WGD, we investigated gene families related to  
454 respiration, aestivation and immune defense from the giant African snail. The  
455 terrestrial adaptation of Stylommatophora was initiated before WGD (~70 MYA), and  
456 we found that several mucus-related gene families expanded early in the  
457 Stylommatophora lineage (100~150 MYA); these genes included the mucin and OST  
458 families, functioning in water retention, immune defense and wound healing. WGD  
459 has been proposed to provide functional redundancy and mutational robustness to  
460 increase the rates of evolution and adaptation<sup>81</sup>. The genes encoding hemocyanins,  
461 involved in O<sub>2</sub> transport, and PCK and FBP, involved in gluconeogenesis, were  
462 doubled and retained after WGD, enhancing the capacity for gas exchange and  
463 glucose homeostasis in aestivation. The extra chromosome copy resulting from  
464 genome duplication might limit the risk of genetic variation in one copy of the  
465 chromosome. In the post-WGD period, zinc metalloproteinase genes were highly  
466 tandemly duplicated, resulting in the protection of tissue against ROS damage arising  
467 from respiration. This evidence indicates that although the A-T transition of the giant  
468 African snail was not initially driven by WGD, WGD could have facilitated its  
469 terrestrial adaptation by providing additional genomic resources, thus increasing the  
470 survival rate in the drastic transition from water to land.

471 Biological invasion has become an increasing serious problem worldwide, as the  
472 international flow of people and goods has increased over the years<sup>82</sup>. With its rich

473 species diversity and strong environmental adaptability, Mollusca is among the phyla  
474 with the greatest numbers of invasive species, such as the golden apple snail and giant  
475 African snail, which are listed among the top 100 global invasive species, although  
476 the invasion mechanism of mollusks is not yet clear. Under genetic bottlenecks, the  
477 invasive species can still adapt to new habitats and expand their populations, which is  
478 referred to as the ‘genetic paradox of invasive species’<sup>83</sup>. Previous reports have  
479 shown that TEs are powerful facilitators of rapid adaptation that generate  
480 “evolutionary potential” by introducing stress-induced changes in invasive species<sup>84</sup>.  
481 In this study, recent TE explosions were observed in all 4 invasive mollusks but were  
482 absent in the other noninvasive mollusks. Genes located near recently emerged TEs  
483 were enriched in the function of stress responses, which is consistent with our  
484 previous findings in the golden apple snail<sup>39</sup>, indicating that the recent TE explosion  
485 might be a common genetic force contributing to biological invasion. In addition,  
486 WGD has been proposed to provide robustness of genetic variation and redundant  
487 gene resources for the rapid evolution of novel functions, driving phenotypic  
488 complexity and ecological adaptation. Therefore, WGD may be another explanation  
489 for the genetic paradox of biological invasion, and species exhibiting WGD may  
490 present greater invasiveness.

491 In summary, we have revealed a WGD occurring on the Sigmurethra-Orthurethra  
492 branch within Stylommatophora providing genomic evidence for the A-T transition in  
493 Mollusca, and we propose WGD as a potential mechanism contributing to biological  
494 invasion. In addition, the obtained genome sequences of giant African snails will

495 enable us to develop more environmentally friendly and efficient control measures  
496 using species-specific gene targets, benefiting the protection of agricultural crops and  
497 ecological environment as well as the prevention of human disease caused by  
498 zoonotic parasites. On the other hand, giant African snails are considered as a  
499 high-protein food source in some parts of the world, especially in Africa and Asia.  
500 The invasive characteristics of giant African snails, such as their rapid growth, high  
501 production rate, and ability to survive harsh conditions, endow them with the potential  
502 to be cultivated as an economic species. Thus, the genome sequence of giant African  
503 snails provides a powerful platform for the genetic breeding of this species, turning  
504 “waste” into wealth.

## 505 **References**

- 506 1 Mable, B., Alexandrou, M. & Taylor, M. Genome duplication in amphibians  
507 and fish: an extended synthesis. *Journal of Zoology* **284**, 151-182 (2011).
- 508 2 Van de Peer, Y., Maere, S. & Meyer, A. The evolutionary significance of  
509 ancient genome duplications. *Nat. Rev. Genet.* **10**, 725 (2009).
- 510 3 Clark, J. W. & Donoghue, P. C. J. Whole-genome duplication and plant  
511 macroevolution. *Trends. Plant. Sci.* **23**, 933-945 (2018).
- 512 4 Orr, H. A. " Why polyploidy is rarer in animals than in plants" revisited. *The*  
513 *American Naturalist* **136**, 759-770 (1990).
- 514 5 Guo, X., He, Y., Zhang, L., Lelong, C. & Jouaux, A. Immune and stress  
515 responses in oysters with insights on adaptation. *Fish Shellfish Immunol.* **46**,



- 516 107-119 (2015).
- 517 6 Hallinan, N. M. & Lindberg, D. R. Comparative analysis of chromosome  
518 counts infers three paleopolyploidies in the mollusca. *Genome. Biol. Evol.* **3**,  
519 1150-1163 (2011).
- 520 7 Jörger, K. M. *et al.* On the origin of Acochlidia and other enigmatic  
521 euthyneuran gastropods, with implications for the systematics of  
522 Heterobranchia. *BMC Evol. Biol.* **10**, 323 (2010).
- 523 8 Cowie, R. H., Dillon, R. T., Robinson, D. G. & Smith, J. W. Alien non-marine  
524 snails and slugs of priority quarantine importance in the United States: A  
525 preliminary risk assessment. *Am. Malacol. Bull.* **27**, 113-133 (2009).
- 526 9 Comai, L. The advantages and disadvantages of being polyploid. *Nat. Rev.*  
527 *Genet.* **6**, 836 (2005).
- 528 10 Van de Peer, Y., Mizrachi, E. & Marchal, K. The evolutionary significance of  
529 polyploidy. *Nat. Rev. Genet.* **18**, 411 (2017).
- 530 11 Furlong, R. F. & Holland, P. W. Were vertebrates octoploid? *Philos. Trans. R.*  
531 *Soc. Lond. B Biol. Sci.* **357**, 531-544 (2002).
- 532 12 Hoegg, S., Brinkmann, H., Taylor, J. S. & Meyer, A. Phylogenetic timing of  
533 the fish-specific genome duplication correlates with the diversification of  
534 teleost fish. *J. Mol. Evol.* **59**, 190-203 (2004).
- 535 13 Flot, J.-F. *et al.* Genomic evidence for ameiotic evolution in the bdelloid  
536 rotifer *Adineta vaga*. *Nature* **500**, 453 (2013).
- 537 14 Kenny, N. J. *et al.* Ancestral whole-genome duplication in the marine

- 538 chelicerate horseshoe crabs. *Heredity* **116**, 190 (2016).
- 539 15 Schwager, E. E. *et al.* The house spider genome reveals an ancient  
540 whole-genome duplication during arachnid evolution. *BMC Biol.* **15**, 62  
541 (2017).
- 542 16 Li, Z. *et al.* Multiple large-scale gene and genome duplications during the  
543 evolution of hexapods. *PNAS* **115**, 4713-4718 (2018).
- 544 17 Nakatani, Y. & McLysaght, A. Macrosynteny analysis shows the absence of  
545 ancient whole-genome duplication in lepidopteran insects. *PNAS* **116**,  
546 1816-1818 (2019).
- 547 18 Lillywhite, H. B., Albert, J. S., Sheehy III, C. M. & Seymour, R. S. Gravity  
548 and the evolution of cardiopulmonary morphology in snakes. *Comp. Biochem.*  
549 *Physiol. A Mol. Integr. Physiol.* **161**, 230-242 (2012).
- 550 19 Vermeij, G. J. & Dudley, R. Why are there so few evolutionary transitions  
551 between aquatic and terrestrial ecosystems? *Biol. J. Linn. Soc.* **70**, 541-554  
552 (2000).
- 553 20 Volkmann, D. & Baluška, F. Gravity: one of the driving forces for evolution.  
554 *Protoplasma* **229**, 143-148 (2006).
- 555 21 Little, C. *The terrestrial invasion: an ecophysiological approach to the origins*  
556 *of land animals.* (CUP Archive, 1990).
- 557 22 Romero, P. E., Pfenninger, M., Kano, Y. & Klussmann-Kolb, A. Molecular  
558 phylogeny of the Ellobiidae (Gastropoda: Panpulmonata) supports  
559 independent terrestrial invasions. *Mol. Phylogenet. Evol.* **97**, 43-54 (2016).

- 560 23 Mukherjee, S., Sarkar, S., Munshi, C. & Bhattacharya, S. *The Uniqueness of*  
561 *Achatina fulica in its Evolutionary Success.* (InTech, 2017).
- 562 24 Hiong, K. C., Loong, A. M., Chew, S. F. & Ip, Y. K. Increases in urea  
563 synthesis and the ornithine–urea cycle capacity in the Giant African Snail,  
564 *Achatina fulica*, during fasting or aestivation, or after the Injection with  
565 ammonium chloride. *J. Exp. Zool. A Comp. Exp. Biol.* **303**, 1040-1053 (2005).
- 566 25 Biscotti, M. A. *et al.* The Lungfish Transcriptome: A Glimpse into Molecular  
567 Evolution Events at the Transition from Water to Land. *Sci. Rep.* **6**, 21571,  
568 doi:10.1038/srep21571 (2016).
- 569 26 Bouchet, P. & Duarte, C. M. *The exploration of marine biodiversity: scientific*  
570 *and technological challenges.* (Fundación BBVA, 2006).
- 571 27 Thiengo, S. C., Faracas, F. A., Salgado, N. C., Cowie, R. H. & Fernandez, M.  
572 A. Rapid spread of an invasive snail in South America: the giant African snail,  
573 *Achatina fulica*, in Brasil. *Biol. Invasions* **9**, 693-702 (2007).
- 574 28 Ferreira, F. S., Albuquerque, U. P., Coutinho, H. D., Almeida Wde, O. & Alves,  
575 R. R. The trade in medicinal animals in northeastern Brazil. *Evid. Based*  
576 *Complement. Alternat. Med.* **2012**, 126938, doi:10.1155/2012/126938 (2012).
- 577 29 Serb, J. M. & Lydeard, C. Complete mtDNA sequence of the North American  
578 freshwater mussel, *Lampsilis ornata* (Unionidae): an examination of the  
579 evolution and phylogenetic utility of mitochondrial genome organization in  
580 Bivalvia (Mollusca). *Mol. Biol. Evol.* **20**, 1854-1866 (2003).
- 581 30 Faure, E. & Casanova, J. P. Comparison of chaetognath mitochondrial

- 582 genomes and phylogenetical implications. *Mitochondrion* **6**, 258-262 (2006).
- 583 31 Aplysia Genome Project. Broad Institute. Vertebrate Biology Group.  
584 doi:<https://www.broadinstitute.org/aplysia/aplysia-genome-project> (2009).
- 585 32 Liu, B. *et al.* Estimation of genomic characteristics by analyzing k-mer  
586 frequency in de novo genome projects. *arXiv* (2013). URL:  
587 <https://arxiv.org/abs/1308.2012>.
- 588 33 Du, X. *et al.* The pearl oyster *Pinctada fucata martensii* genome and  
589 multi-omic analyses provide insights into biomineralization. *Gigascience* **6**,  
590 1-12 (2017).
- 591 34 Takeuchi, T. *et al.* Draft genome of the pearl oyster *Pinctada fucata*: a platform  
592 for understanding bivalve biology. *DNA Res.* **19**, 117-130 (2012).
- 593 35 Simakov, O. *et al.* Insights into bilaterian evolution from three spiralian  
594 genomes. *Nature* **493**, 526-531 (2013).
- 595 36 Albertin, C. B. *et al.* The octopus genome and the evolution of cephalopod  
596 neural and morphological novelties. *Nature* **524**, 220-224 (2015).
- 597 37 Uliano-Silva, M. *et al.* A hybrid-hierarchical genome assembly strategy to  
598 sequence the invasive golden mussel, *Limnoperna fortunei*. *Gigascience* **7**,  
599 doi:10.1093/gigascience/gix128 (2018).
- 600 38 Adema, C. M. *et al.* Whole genome analysis of a schistosomiasis-transmitting  
601 freshwater snail. *Nat. Commun.* **8**, 15451, doi:10.1038/ncomms15451 (2017).
- 602 39 Liu, C. *et al.* The genome of the golden apple snail *Pomacea canaliculata*  
603 provides insight into stress tolerance and invasive adaptation. *Gigascience* **7**,

- 604           doi:10.1093/gigascience/giy101 (2018).
- 605    40    Guo, Y. *et al.* A chromosomal-level genome assembly for the giant African  
606           snail *Achatina fulica*. *Gigascience* **8**, doi:10.1093/gigascience/giz124 (2019).
- 607    41    Tan, S. K. & Low, M. E. Y. An update to the West African *Limicolaria*  
608           *flammea* (Müller, 1774) in Singapore, and its distinction from the confamilial  
609           *Achatina fulica* Bowdich, 1822 (Mollusca: Gastropoda: Achatinidae). *Nature*  
610           *in Singapore* **4**, 311-317 (2011).
- 611    42    Koren, S. *et al.* Canu: scalable and accurate long-read assembly via adaptive  
612           k-mer weighting and repeat separation. *Genome Res.* **27**, 722-736 (2017).
- 613    43    Ruan, J. & Li, H. Fast and accurate long-read assembly with wtdbg2. *BioRxiv*,  
614           (2019). URL: <https://www.biorxiv.org/content/10.1101/530972v1.full>.  
615           DOI: <https://doi.org/10.1101/530972>.
- 616    44    Walker, B. J. *et al.* Pilon: an integrated tool for comprehensive microbial  
617           variant detection and genome assembly improvement. *PloS one* **9**, e112963  
618           (2014).
- 619    45    Stamatakis, A. RAxML version 8: a tool for phylogenetic analysis and  
620           post-analysis of large phylogenies. *Bioinformatics* **30**, 1312-1313 (2014).
- 621    46    Sanderson, M. J. r8s: inferring absolute rates of molecular evolution and  
622           divergence times in the absence of a molecular clock. *Bioinformatics* **19**,  
623           301-302 (2003).
- 624    47    Feschotte, C. & Wessler, S. R. Mariner-like transposases are widespread and  
625           diverse in flowering plants. *Proceedings of the National Academy of Sciences*

- 626           **99**, 280-285 (2002).
- 627    48    Hua-Van, A., Le Rouzic, A., Boutin, T. S., Filée, J. & Capy, P. The struggle for  
628           life of the genome's selfish architects. *Biology direct* **6**, 19 (2011).
- 629    49    Werren, J. H. Selfish genetic elements, genetic conflict, and evolutionary  
630           innovation. *PNAS* **108**, 10863-10870 (2011).
- 631    50    Amores, A. *et al.* Zebrafish hox clusters and vertebrate genome evolution.  
632           *Science* **282**, 1711-1714 (1998).
- 633    51    Sessa, E. B. Polyploidy as a mechanism for surviving global change. *New*  
634           *Phytol.* **221**, 5-6 (2019).
- 635    52    Petersen, S. V., Dutton, A. & Lohmann, K. C. End-Cretaceous extinction in  
636           Antarctica linked to both Deccan volcanism and meteorite impact via climate  
637           change. *Nat. Commun.* **7**, 12079 (2016).
- 638    53    Fawcett, J. A., Maere, S. & Van De Peer, Y. Plants with double genomes might  
639           have had a better chance to survive the Cretaceous–Tertiary extinction event.  
640           *PNAS* **106**, 5737-5742 (2009).
- 641    54    Marshall, C. R. & Ward, P. D. Sudden and gradual molluscan extinctions in  
642           the latest Cretaceous of western European Tethys. *Science* **274**, 1360-1363  
643           (1996).
- 644    55    Thiriot-Quévieux, C. Advances in chromosomal studies of gastropod  
645           molluscs. *J. Mollus. Stud.* **69**, 187-202 (2003).
- 646    56    Aktipis, S. W. & Giribet, G. A phylogeny of Vetigastropoda and other  
647           “archaeogastropods”: re-organizing old gastropod clades. *Invertebr. Biol.* **129**,

- 648 220-240 (2010).
- 649 57 Ashley-Ross, M. A., Hsieh, S. T., Gibb, A. C. & Blob, R. W. Vertebrate land  
650 invasions-past, present, and future: an introduction to the symposium. *Integr.*  
651 *Comp. Biol.* **53**, 192-196 (2013).
- 652 58 Hsia, C. C., Schmitz, A., Lambertz, M., Perry, S. F. & Maina, J. N. Evolution  
653 of air breathing: oxygen homeostasis and the transitions from water to land  
654 and sky. *Compr. Physiol.* **3**, 849-915 (2013).
- 655 59 Markl, J. Evolution of molluscan hemocyanin structures. *Biochim. Biophys.*  
656 *Acta* **1834**, 1840-1852 (2013).
- 657 60 Kato, S., Matsui, T., Gatsogiannis, C. & Tanaka, Y. Molluscan hemocyanin:  
658 structure, evolution, and physiology. *Biophys. Rev.* **10**, 191-202 (2018).
- 659 61 Shen, S. *et al.* ABCG2 reduces ROS-mediated toxicity and inflammation: a  
660 potential role in Alzheimer's disease. *J. Neurochem.* **114**, 1590-1604 (2010).
- 661 62 Kruse, M. N. *et al.* Human meprin  $\alpha$  and  $\beta$  homo-oligomers: cleavage of  
662 basement membrane proteins and sensitivity to metalloprotease inhibitors.  
663 *Biochem. J.* **378**, 383-389 (2004).
- 664 63 Faa, G. *et al.* Zinc in gastrointestinal and liver disease. *Coordin. Chem. Rev.*  
665 **252**, 1257-1269 (2008).
- 666 64 Storey, K. B. Life in the slow lane: Molecular mechanisms of estivation. *Comp.*  
667 *Biochem. Physiol. A Mol. Integr. Physiol.* **133**, 733-754 (2002).
- 668 65 Ip, Y. K. & Chew, S. F. *Nitrogen Metabolism and Excretion During*  
669 *Aestivation*. (Springer Heidelberg Dordrecht London New York, 2010).

- 670 66 Bell, R. A., Dawson, N. J. & Storey, K. B. Insights into the in vivo regulation  
671 of glutamate dehydrogenase from the foot muscle of an estivating land snail.  
672 *Enzyme Res.* **2012**, 317314, doi:10.1155/2012/317314 (2012).
- 673 67 Bulutoglu, B., Garcia, K. E., Wu, F., Minter, S. D. & Banta, S. Direct  
674 Evidence for Metabolon Formation and Substrate Channeling in Recombinant  
675 TCA Cycle Enzymes. *ACS Chem. Biol.* **11**, 2847-2853 (2016).
- 676 68 Oja, S. S., Saransaari, P. & Korpi, E.R. Neurotoxicity of Ammonia.  
677 *Neurochem. Res.* **42**, 713 (2017).
- 678 69 Hermenegildo, C., Monfort, P. & Felipo, V. Activation of  
679 N-Methyl-D-Aspartate Receptors in Rat Brain In Vivo Following Acute  
680 Ammonia Intoxication: Characterization by In Vivo Brain Microdialysis.  
681 *Hepatology* **31**, 709-715 (2000).
- 682 70 Onadeko, A. B. & Egonmwan, R. I. Water Relations, Weight Loss and  
683 Nitrogenous Waste Products in the Giant African Land Snail *Archachatina*  
684 *Marginata* (Swainson) – Pulmonata: Achatinidae. *J. Sci. Res. Dev.* **17**, 40-47  
685 (2017).
- 686 71 Diez-Fernandez, C., Gallego, J., Haberle, J., Cervera, J. & Rubio, V. The  
687 Study of Carbamoyl Phosphate Synthetase 1 Deficiency Sheds Light on the  
688 Mechanism for Switching On/Off the Urea Cycle. *J Genet Genomics* **42**,  
689 249-260 (2015).
- 690 72 Wang, L., Qiu, L., Zhou, Z. & Song, L. Research progress on the mollusc  
691 immunity in China. *Dev. Comp. Immunol.* **39**, 2-10 (2013).



- 692 73 Begum, N., Matsumoto, M., Tsuji, S., Toyoshima, K. & Seya, T. The primary  
693 host defense system across humans, flies and plants. *Curr. Trends Immunol.* **3**,  
694 59-74 (2000).
- 695 74 Iguchi, S. M., Aikawa, T. & Matsumoto, J. J. Antibacterial activity of snail  
696 mucus mucin. *Comp. Biochem. Physiol. A Physiol.* **72**, 571-574 (1982).
- 697 75 Wertheim, B., Beukeboom, L. & Van de Zande, L. Polyploidy in animals:  
698 effects of gene expression on sex determination, evolution and ecology.  
699 *Cytogenet. Genome Res.* **140**, 256-269 (2013).
- 700 76 Barrows, E. M. *Animal behavior desk reference: a dictionary of animal*  
701 *behavior, ecology, and evolution.* (CRC press, 2000).
- 702 77 Soltis, D. E. *et al.* Polyploidy and angiosperm diversification. *Am. J. Bot.* **96**,  
703 336-348 (2009).
- 704 78 Vanneste, K., Baele, G., Maere, S. & Van de Peer, Y. Analysis of 41 plant  
705 genomes supports a wave of successful genome duplications in association  
706 with the Cretaceous–Paleogene boundary. *Genome Res.* **24**, 1334-1347 (2014).
- 707 79 Kameda, Y. & Kato, M. Terrestrial invasion of pomatiopsid gastropods in the  
708 heavy-snow region of the Japanese Archipelago. *BMC Evol. Biol.* **11**, 118  
709 (2011).
- 710 80 Barker, G. M. *Gastropods on land: phylogeny, diversity and adaptive*  
711 *morphology.* 1-146 (CAB International, 2001).
- 712 81 Crow, K. D. & Wagner, G. P. What is the role of genome duplication in the  
713 evolution of complexity and diversity? *Mol. Biol. Evol.* **23**, 887-892 (2006).

714 82 Wan, F., Jiang, M. & Zhan, A. *Biological invasions and its management in*  
715 *china*. Vol. 1 (Springer, 2017).

716 83 Frankham, R. Resolving the genetic paradox in invasive species. *Heredity* **94**,  
717 385-385 (2005).

718 84 Stapley, J., Santure, A. W. & Dennis, S. R. Transposable elements as agents of  
719 rapid adaptation may explain the genetic paradox of invasive species. *Mol.*  
720 *Ecol.* **24**, 2241-2252 (2015).

721

722

723

## 724 **Figure legends**

725 **Figure 1. The general characteristics of *A.immaculata*.** (a) The morphological  
726 difference: *A. immaculata* has relatively longer shell with pink or purple columella,  
727 while *A. fulica* has shorter shell with white columella. (b) Global invasion regions for  
728 *A. immaculata* (top) and *A. fulica* (bottom). Currently, *A. fulica* is more widely  
729 distributed, but *A. immaculata* has more advantage with a faster invasion speed. (c)  
730 The sketch map showed the major physiological specialty of *A. immaculata*, including  
731 immune innovation, eupulmonates lung, estivation and mucus. (d) Genomic features  
732 showed by Circos plot. Track n: 31 linkage groups of the genome; Track d-m:  
733 expression profile of brain, egg, eye, hemocytes, hepatopancreas, kidney, lungs,  
734 muscle, ovary and testis tissues; Track c: distribution of transposon elements; Track b:

735 distribution of gene density; Track a: distribution of GC content.

736 **Figure 2. Evolutionary analysis of *A.immaculata*.** (a) Phylogenetic placement of *A.*

737 *immaculata* within the dated tree of mollusks. The estimated divergence time is

738 shown at each branching point, and each lineage is shown in different color blocks. *A.*

739 *immaculata* is highlighted in red. (b) Categories of orthologous and paralogous genes

740 in various phyla and species. (c) Classification and contents of repetitive sequences in

741 *A. immaculata* and other mollusks. (d) Distribution of divergence rate for the class of

742 DNA transposons in mollusks genomes. The divergence rate was calculated by

743 comparing all TE sequences identified in the genome to the corresponding consensus

744 sequence in each TE subfamily. The arrow indicates that both *A. immaculata* and *A.*

745 *fulica* had a recent explosion of TEs at divergence rate of ~5%.

746 **Figure 3. Whole genome duplication shared by *A. immaculata* and *A. fulica*.**

747 Circos plots showed the homologous gene pairs in chromosome-level microsynteny

748 among the *A. immaculata* (a) and *A. fulica* (b) individually, as well as chromosomes

749 between *A. immaculata* and *A. fulica* (c), *A. immaculata* and *P. canaliculata* (d), *A.*

750 *immaculata* and *P. fucata* (e). (f) Gene age distribution of Ks values calculated from

751 orthologous gene pairs, among *A. immaculata*, *A. fulica*, and *P. canaliculata*

752 individually, as well as between *A. immaculata* and *A. fulica*, *A. immaculata* and *B.*

753 *glabrata*. (E) Comparison of the catalog of Hox genes. *A. immaculata* and *A. fulica*

754 have more Hox genes than the other molloscus, because of the retained genes on the

755 duplicated chromosome. These evidences collectively support a whole genome

756 duplication event shared by *A. immaculata* and *A. fulica*, which is not found in other  
757 mollusks.

758 **Figure 4. Chromosome relationship and karyotype inferring.** Clustering of  
759 chromosomes for *A. immaculata* (a) and *A. fulica* (b). Each group corresponding to an  
760 orthologous chromosome pair derived from WGD, with the links between  
761 chromosome pairs representing the mutual best-hit gene pairs. (c) Evolution of  
762 karyotype in mollusks. The common ancestor of Gastropoda and Bivalvia is estimated  
763 to have 8 monoploid chromosomes, while that of Gastropoda has 14. Chromosome  
764 breaks, fusions, as well as chromosome number doubling by WGD, formed the  
765 current karyotype of living mollusks.

766 **Figure 5. Oxygen transport and anti-oxidization in the respiratory.** (a) The  
767 phylogenetic relationship of hemocyanin genes among mollusks. The protein IDs  
768 covered with different colors meant different species. (b) The phylogenetic  
769 relationship of zinc metalloproteinases among gastropoda, with same style to that of  
770 (a). (c) Comparison of hemocyanin locations in the chromosomes of *A. immaculata*, *A.*  
771 *fulica* and *P. canaliculata*. Hemocyanin genes of *A. immaculata* and *A. fulica* were  
772 distributed in two chromosomes, whereas *P. canaliculata* was only in one contig. (d)  
773 The evolution process of zinc metalloproteinase genes in *A. immaculata* and *A. fulica*.  
774 The shared ancient ancestor might have only one zinc metalloproteinase gene located  
775 on one chromosome, WGD (~70 MYA) event doubles the chromosome and gene  
776 number, followed by gene expansion on one chromosome and deletion on the  
777 corresponding chromosome, resulting in a tandem-cluster of 11 genes and 9 genes in

778 *A. immaculata* and *A. fulica*, respectively.

779 **Figure 6. Flowchart of glucose homeostasis and urea-cycle in aestivation of *A.***

780 *immaculata*. (a)The key processes and related gene expression change of

781 gluconeogenesis and TCA cycle in aestivation compared with normal group. The left

782 part represented the major genes participated in gluconeogenesis, while the right part

783 represented the major genes participated in TCA cycle. Two types of arrows were

784 used, double-line arrow meant a number of steps, and single-line arrow meant one

785 step. Two shapes were used, rectangle meant production, and ellipse meant enzymes,

786 with color red and blue representing up-regulated and down-regulated respectively.

787 Ellipse with symbol “\*” meant this enzyme had two genes derived from WGD. (b)

788 The key processes and related gene expression change of ornithine-urea cycle in

789 aestivation compared with normal groups, the style is same to that of (a).

790 **Figure 7. The immune repertoire of *A. immaculata* and the expansion of OST. (a)**

791 The immunity of *A. immaculata* is presented in mucus, pattern recognition receptors,

792 and soluble effectors. The mucus system covered epidermis, mainly including

793 archacin, mucin and acharan sulfate secreted through the NDST pathway, which were

794 presented with green ellipse. The pattern recognition system on the cytomembrane

795 (orange color) contained PGRP, lectin, TFNR, TLR, FREP, GNBP, SR, TEP, and

796 secreted soluble effector (red ellipse) in the downstream immune cascading. (b) The

797 expansion of OST genes. Phylogenetic analyses were performed using MEGA7

798 through maximum likelihood. The OST genes from different species were indicated in

799 circus filled with different colors.

## 800 **Methods**

### 801 **Samples collection and genome sequencing**

802 Adults of *A. immaculata* were collected from a local farm in Yangjiang,  
803 Guangdong province, China, and maintained at  $25 \pm 2$  °C for a week before  
804 processing. Genomic DNA was extracted from the foot muscles of a single snail for  
805 constructing PCR-free Illumina 350-bp insert libraries and PacBio 20-kb insert library,  
806 and sequenced on Illumina HiSeq-X and PacBio SMRT platforms, respectively. The  
807 Hi-C library was prepared using the muscle tissue of another single snail by the  
808 following methods: Nuclear DNA was cross-linked in situ, extracted, and then  
809 digested with a restriction enzyme. The sticky ends of the digested fragments were  
810 biotinylated, diluted, and then ligated to each other randomly. Biotinylated DNA  
811 fragments were enriched and sheared again for preparing the sequencing library,  
812 which was then sequenced on a HiSeq-X platform (Illumina).

### 813 **RNA sample preparation and transcriptome sequencing**

814 Ten tissues including brains, eggs (2 days post fertilization), eyes, hemocytes,  
815 hepatopancreas, kidneys, lungs, muscles, ovaries and testes from six animals were  
816 collected as replicates. Eighty snails were employed for the immune elicitor challenge  
817 experiment, and they were equally divided into control group, LPS  
818 (lipopolysaccharide) group, PGN (peptidoglycan) group, GLU ( $\beta$ -glucan) group and  
819 IC (poly I:C) group. The five groups of snails received injections of 100  $\mu$ L

820 phosphatic buffer solution (PBS, 0.14 M NaCl, 3 mM KCl, 8 mM NaH<sub>2</sub>PO<sub>4</sub>·12H<sub>2</sub>O,  
821 1.5 mM K<sub>2</sub>HPO<sub>4</sub>, pH7.4), LPS from *Escherichia coli* 0111:B4 (Sigma-Aldrich, 0.5  
822 mg·ml<sup>-1</sup> in PBS), PGN from *Staphylococcus aureus* (Sigma-Aldrich, 0.8 mg·ml<sup>-1</sup> in  
823 PBS), GLU from *Saccharomyces cerevisiae* (Sigma-Aldrich, 1.0 mg·ml<sup>-1</sup> in PBS), and  
824 poly I:C (Sigma-Aldrich, 1.0 mg·ml<sup>-1</sup> in PBS), respectively. These treated snails were  
825 maintained after injection, and fifteen individuals from each group were randomly  
826 sampled at 12 h post-injection. Non-aestivation snails were feeding with enough food  
827 and water, whereas aestivation snails were fasting and treated with high temperature,  
828 and hemolymph of these two groups were collected around 10 days after the  
829 epiphragma formation. Hemolymph samples of all the treated group were collected  
830 from five individuals were pooled into one sample. There were three replicates for  
831 each sample. In final, total RNAs were extracted from the stored tissues, and then  
832 mRNAs were pulled out by beads with poly-T for constructing cDNA libraries (insert  
833 350-bp), and sequenced on an Illumina HiSeq-X sequencer.

### 834 **Genome assembly**

835 The Illumina raw reads were filtered by trimming the adapter sequence and  
836 low-quality regions  
837 ([https://github.com/fanagislab/assembly\\_2ndGeneration/tree/master/clean\\_illumina](https://github.com/fanagislab/assembly_2ndGeneration/tree/master/clean_illumina)),  
838 resulting in clean and high-quality reads with an average error rate < 0.001. For the  
839 PacBio raw data, the short subreads (< 2 kb) and low-quality (error rate > 0.2)  
840 subreads were filtered out, and only one representative subread was retained for each

841 PacBio read. The clean PacBio reads were corrected by Canu 1.8<sup>42</sup> and then  
842 assembled by Wtdbg2<sup>43</sup>. The PacBio reads were employed to polish the raw contigs  
843 by a module within Wtdbg2, after which Illumina reads were aligned to the contigs by  
844 BWA-MEM, and single base errors in the contigs were corrected by Pilon 2.10<sup>44</sup> with  
845 the parameters “-fix bases, -nonpf, -minqual 20”. Next, Hi-C sequencing data were  
846 aligned to the haploid reference contigs by HiC-Pro 2.11.1<sup>85</sup>, and then these contigs  
847 were clustered, ordered, and orientated into chromosomes with LACH-ESIS<sup>86</sup>.

#### 848 **Genome annotation**

849 A de novo repeat library for *A. immaculata* was constructed by RepeatModeler  
850 (v1.0.4; <http://www.repeatmasker.org/RepeatModeler.html>). TEs in the *A. immaculata*  
851 genome were identified by RepeatMasker (v4.0.6; <http://www.repeatmasker.org/>)  
852 using both the Repbase library and the de novo library. Tandem repeats in the *A.*  
853 *immaculata* genome were predicted using Tandem Repeats Finder v4.07b<sup>87</sup>. The  
854 divergence rates of TEs were calculated between the identified TE elements in the  
855 genome and their consensus sequence at the TE family level.

856 The gene models in the *A. immaculata* genome were predicted by EVM v1.1.1<sup>88</sup>  
857 integrating evidences from ab initio predictions, homology-based searches and  
858 RNA-seq alignments. Then, these gene models were annotated by RNA-seq data,  
859 UniProt database and InterProScan software<sup>89</sup>. Finally, the gene models were retained  
860 if they had at least one piece of supporting evidence from the UniProt database,  
861 InterProScan domain and RNA-seq data. Gene functional annotation was performed



862 by aligning the protein sequences to the NCBI NR, UniProt, COG and KEGG  
863 databases with BLASTP v2.3.0+ under an E-value cutoff of  $10^{-5}$  and choosing the best  
864 hit. Pathway analysis and functional classification were conducted based on the  
865 KEGG database<sup>90</sup>. InterProScan was used to assign IPR domains and GO terms to the  
866 gene models.

### 867 **Evolutionary analysis**

868 Orthologous and paralogous groups were assigned from 11 species (*A.*  
869 *immaculata*, *A. fulica*, *Aplysia californica*, *Biomphalaria glabrata*, *Pomacea*  
870 *canaliculata*, *Lottia gigantea*, *Crassostrea gigas*, *Pintada fucata*, *Limnoperna fortunei*,  
871 *Octopus bimaculoides* and *Lingula anatina*) by OrthoFinder<sup>91</sup> with default parameters.  
872 OGs that contained only one gene for each species were selected to construct the  
873 phylogenetic tree. The protein sequences of each gene family were independently  
874 aligned by muscle v3.8.31<sup>92</sup> and then concatenated into one super-sequence. The  
875 phylogenetic tree was constructed by maximum likelihood (ML) using RAxML  
876 8.2.12<sup>45</sup>, with the best-fit model (LG+IGF) estimated by ProtTest3<sup>93</sup>. The absolute  
877 rates of molecular evolution and divergence times were estimated by r8s<sup>46</sup>. The tree  
878 was calibrated with the following time frames to constrain the age of the nodes  
879 between the species: minimum = 260 Ma and maximum = 290 MYA for *P. fucata* and  
880 *C. gigas*<sup>94</sup>; minimum = 450 MYA and maximum = 480 MYA for *A. californica* (or *B.*  
881 *glabrata*) and *L. gigantea*<sup>95</sup>. The calibration time (fossil record time) interval (550-610  
882 MYA) of *O. bimaculoides* was adopted from previous results<sup>96</sup>.

## 883 **Transcriptome data analysis**

884 Transcriptome reads were trimmed with the same method for genomic reads  
885 ([https://github.com/fanagislab/assembly\\_2ndGeneration/tree/master/clean\\_illumina](https://github.com/fanagislab/assembly_2ndGeneration/tree/master/clean_illumina)),  
886 and then mapped to the reference genome of *A. immaculata* using TopHat (v. 2.1.0)  
887 with default settings. The expression level of each reference gene in terms of FPKM  
888 was computed by cufflinks v2.2.1. A gene was considered to be expressed if the  
889 FPKM > 0. Differential gene expression analysis was conducted using cuffdiff v2.2.1.

## 890 **WGD verification**

891 The analyses incorporating chromosome-level macrosynteny analysis, colinearity  
892 blocks, Ks peak and Hox gene clusters were employed to verify the WGD in giant  
893 African snails. Based on 4 chromosome-level molluscan genomes, the macrosynteny  
894 was identified using homologous gene sets. Genes from different species would be  
895 identified as homologous gene pairs when they had mutual best BLASTP hits with  
896 each other. The conserved macrosynteny between species with chromosome-level  
897 assemblies was displayed in dot plot. Each dot in the dot plot comparison represents a  
898 one-to-one homologous gene pair mentioned above. Based on the dot plot, we  
899 inferred the circus plot and dual synteny plot. Then, MCScanX was also used with  
900 default parameters to identify the colinearity blocks in *A. immaculata* and *A. fulica*<sup>97</sup>.  
901 Ks distribution of gene pairs in colinearity blocks was calculated by ParaAT<sup>98</sup> and  
902 KaKs\_calculator 2.0<sup>99</sup>. The homeobox genes were identified in the giant African  
903 snails using BLAST ( $E < e^{-5}$ ) against all homeodomain sequences from the

904 HomeoDB database (<http://homeodb.zoo.ox.ac.uk/>), and were further confirmed by  
905 comparing to the Conserved Domains Database (<http://www.ncbi.nlm.nih.gov/cdd>).

### 906 **Gene family analysis**

907 To identify gene families involved in pathways of respiration, aestivation and  
908 immune functions, we performed manual curation for identification of homologous  
909 genes by three steps. Initially, we aligned known genes of other close species to the *A.*  
910 *immaculata* genome by BLASTP with best hits ( $E < e^{-5}$ ), and followed by the  
911 analysis of paralogous genes performed by OrthoFinder. Then, the obtained genes  
912 were used to perform phylogeny analysis by maximum likelihood (ML) method with  
913 MEGA7<sup>100</sup>, to further validate the accuracy and reveal the phylogenetic relationship  
914 of these genes.

### 915 **Data availability**

916 Data relating with the findings of this work are available within the paper and the  
917 Supplementary Information files. A reporting summary for this Article is available as  
918 a Supplementary Information file. Source data are provided as a Source Data file. All  
919 the raw sequencing data generated during this study have been deposited at NCBI as a  
920 BioProject under accession PRJNA561271. Genomic and transcriptome sequence  
921 reads have been deposited in the SRA database with BioSample: SAMN12612888.  
922 The Whole Genome Shotgun project of *A. immaculata* has been deposited at  
923 DDBJ/ENA/GenBank under the accession WNKJ000000000. The version described in

924 this paper is version WNKJ00000000. The genome assemblies and annotation files  
925 are available at the website  
926 [ftp://ftp.agis.org.cn/~fanwei/Achatina\\_immaculata\\_genome/](ftp://ftp.agis.org.cn/~fanwei/Achatina_immaculata_genome/).

### 927 **Code availability**

928 The in-house software clean\_adapter [[https://github.com/fanagislab/](https://github.com/fanagislab/assembly_2ndGeneration/blob/master/clean_illumina/clean_adapter)  
929 [assembly\\_2ndGeneration/blob/master/clean\\_illumina/clean\\_adapter](https://github.com/fanagislab/assembly_2ndGeneration/blob/master/clean_illumina/clean_adapter)] and  
930 clean\_lowqual  
931 [[https://github.com/fanagislab/assembly\\_2ndGeneration/blob/master/clean\\_illumina/](https://github.com/fanagislab/assembly_2ndGeneration/blob/master/clean_illumina/clean_lowqual)  
932 [clean\\_lowqual](https://github.com/fanagislab/assembly_2ndGeneration/blob/master/clean_illumina/clean_lowqual)] are used to filter the adapter and low-quality sequence.

### 933 **Methods references**

934 85 Servant, N. *et al.* HiC-Pro: an optimized and flexible pipeline for Hi-C data  
935 processing. *Genome Biol.* **16**, 259 (2015).  
936 86 Burton, J. N. *et al.* Chromosome-scale scaffolding of de novo genome  
937 assemblies based on chromatin interactions. *Nat. Biotechnol.* **31**, 1119 (2013).  
938 87 Benson, G. Tandem repeats finder: a program to analyze DNA sequences.  
939 *Nucleic Acids Res.* **27**, 573-580 (1999).  
940 88 Haas, B. J. *et al.* Automated eukaryotic gene structure annotation using  
941 EVidenceModeler and the Program to Assemble Spliced Alignments. *Genome*  
942 *Biol.* **9**, R7, doi:10.1186/gb-2008-9-1-r7 (2008).  
943 89 Jones, P. *et al.* InterProScan 5: genome-scale protein function classification.

- 944            *Bioinformatics* **30**, 1236-1240 (2014).
- 945    90    Aoki, K. F. & Kanehisa, M. Using the KEGG database resource. *Current*  
946            *protocols in bioinformatics* **11**, 1.12. 11-11.12. 54 (2005).
- 947    91    Emms, D. M. & Kelly, S. OrthoFinder: solving fundamental biases in whole  
948            genome comparisons dramatically improves orthogroup inference accuracy.  
949            *Genome Biol.* **16**, 157 (2015).
- 950    92    Edgar, R. C. MUSCLE: multiple sequence alignment with high accuracy and  
951            high throughput. *Nucleic Acids Res.* **32**, 1792-1797 (2004).
- 952    93    Darriba, D., Taboada, G. L., Doallo, R. & Posada, D. ProtTest 3: fast selection  
953            of best-fit models of protein evolution. *Bioinformatics* **27**, 1164-1165 (2011).
- 954    94    Sun, J. *et al.* Adaptation to deep-sea chemosynthetic environments as revealed  
955            by mussel genomes. *Nat. Ecol. Evol.* **1**, 0121 (2017).
- 956    95    Benton, M., Donoghue, P. & Asher, R. *The Timetree of Life, chapter*  
957            *Calibrating and constraining molecular clocks.* (Oxford University Press,  
958            2009).
- 959    96    Zapata, F. *et al.* Phylogenomic analyses of deep gastropod relationships reject  
960            Orthogastropoda. *P. Roy. Soc. B Biol. Sci* **281**, 20141739 (2014).
- 961    97    Wang, Y. *et al.* MCScanX: a toolkit for detection and evolutionary analysis of  
962            gene synteny and collinearity. *Nucleic Acids Res.* **40**, e49-e49 (2012).
- 963    98    Zhang, Z. *et al.* ParaAT: a parallel tool for constructing multiple  
964            protein-coding DNA alignments. *Biochem. Biophys. Res. Commun.* **419**,  
965            779-781 (2012).

966 99 Wang, D., Zhang, Y., Zhang, Z., Zhu, J. & Yu, J. KaKs\_Calculator 2.0: a  
967 toolkit incorporating gamma-series methods and sliding window strategies.  
968 *Genom. Proteom. Bioinf.* **8** 77-80 (2010).

969 100 Kumar, S., Stecher, G. & Tamura, K. MEGA7: Molecular Evolutionary  
970 Genetics Analysis Version 7.0 for Bigger Datasets. *Mol. Biol. Evol.* **33**,  
971 1870-1874 (2016).

972

### 973 **Acknowledgements**

974 The work was funded by the National key research and development program of  
975 China (2016YFC1200600), the Agricultural Science and Technology Innovation  
976 Program && The Elite Young Scientists Program of CAAS, Fundamental Research  
977 Funds for Central Non-profit Scientific Institution (No.Y2017JC01), the Agricultural  
978 Science and Technology Innovation Program Cooperation and Innovation Mission  
979 (CAAS-XTCX2016), Fund of Key Laboratory of Shenzhen  
980 (ZDSYS20141118170111640), as well as National Natural Science Foundation of  
981 China (Grant Nos. 31801804).

### 982 **Author contributions**

983 W. F. and W. Q. Q. conceived and led the project; C. H. L. and Y. W. R. prepared  
984 DNA and RNA for sequencing; C. H. L. performed genome assembly, annotation,  
985 evolution, whole genome duplication, and immune analysis; Y.W.R. performed

986 respiration and aestivation analysis; W. F., W. Q. Q., C. H. L. and Y. W. R. wrote and

987 revised the manuscript.

988 **Competing interests**

989 The authors declare no competing interests.

990

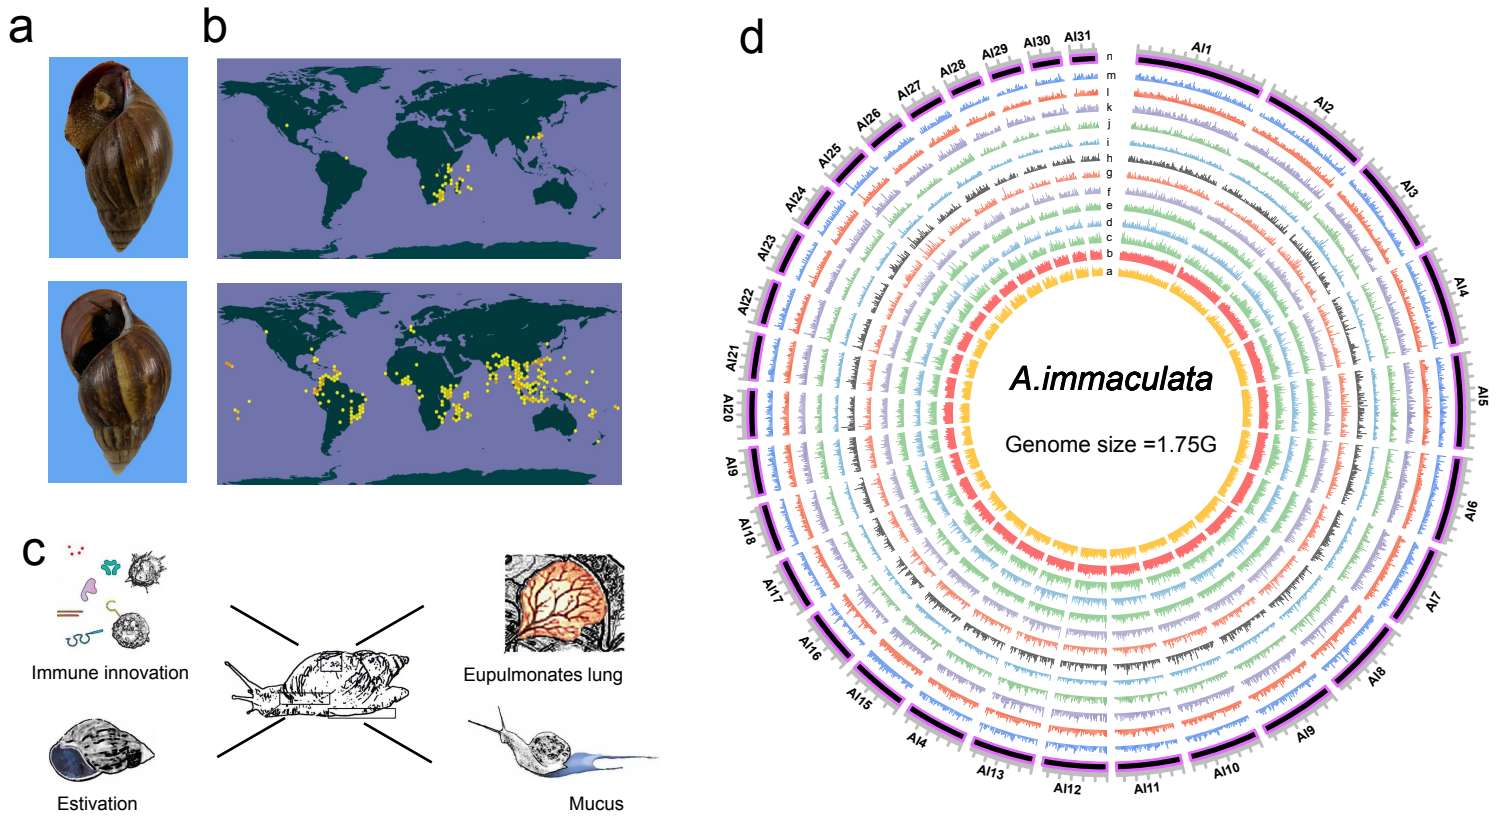



**a**

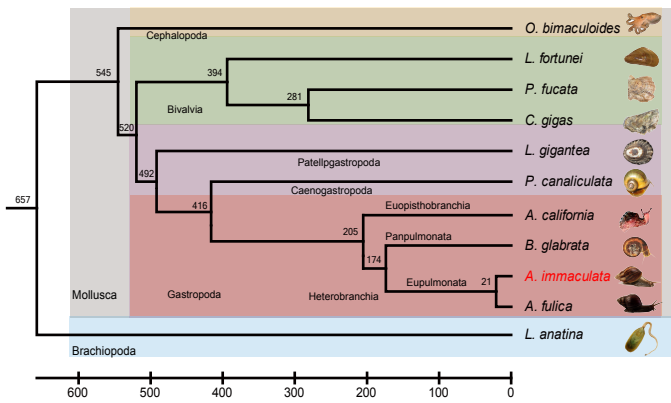

**b**

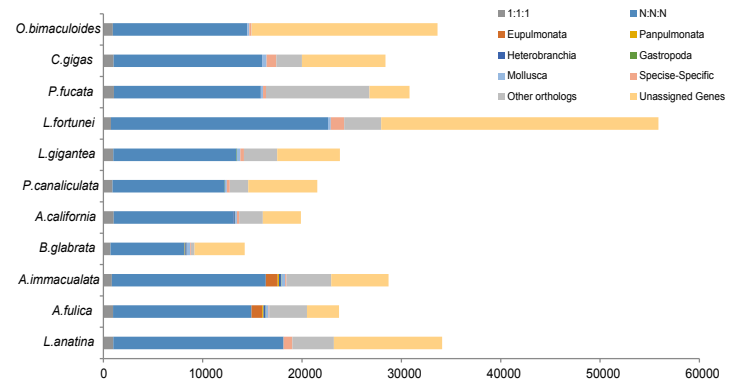

**c**

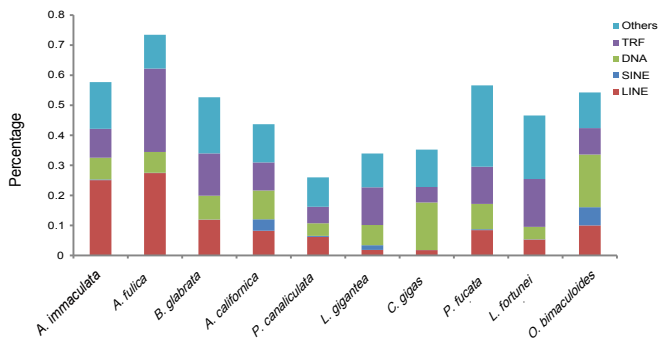

**d**

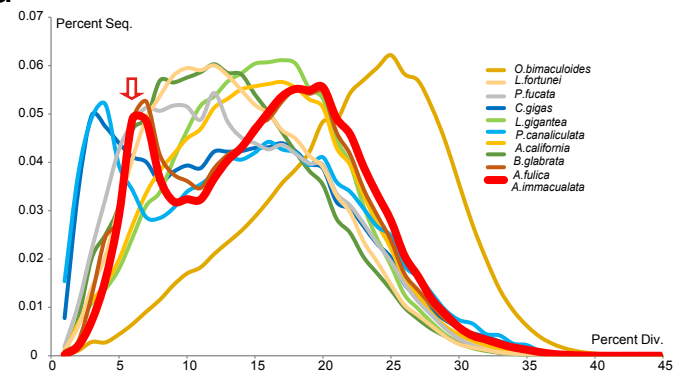

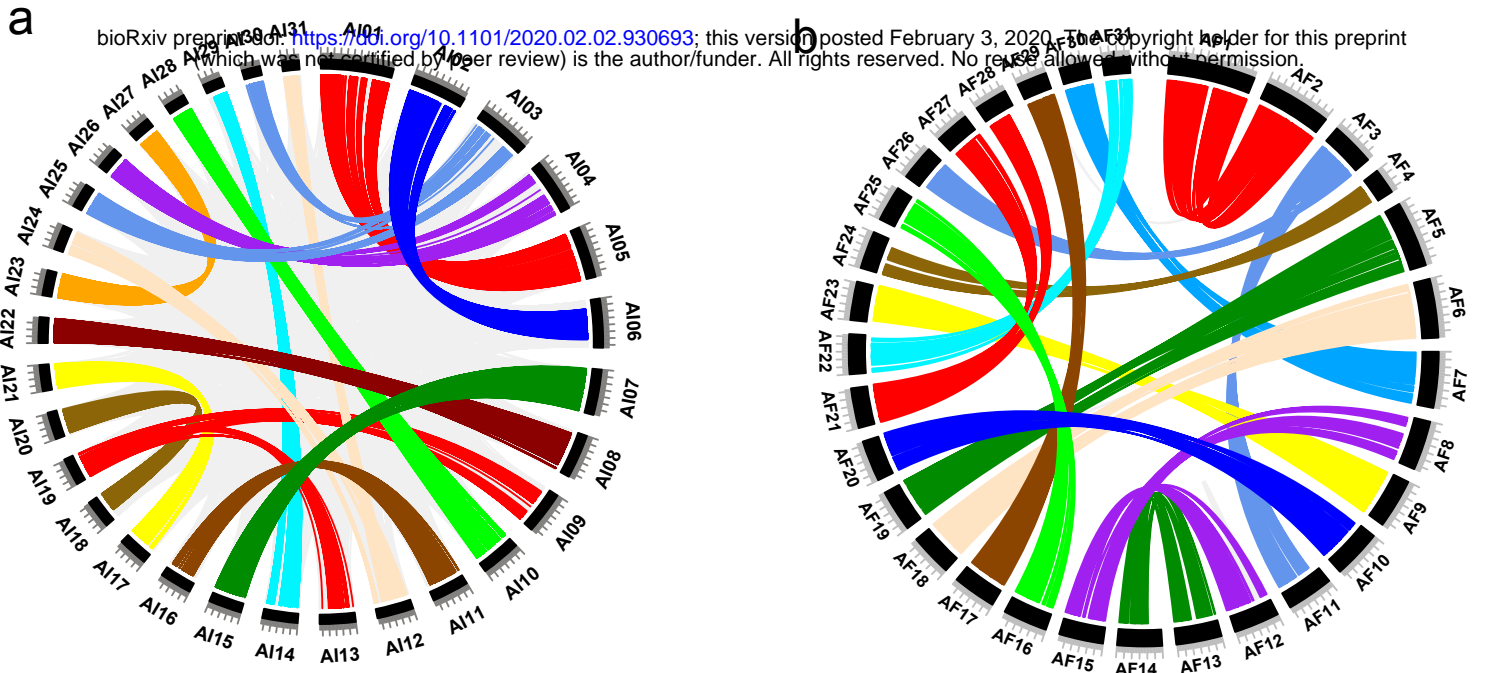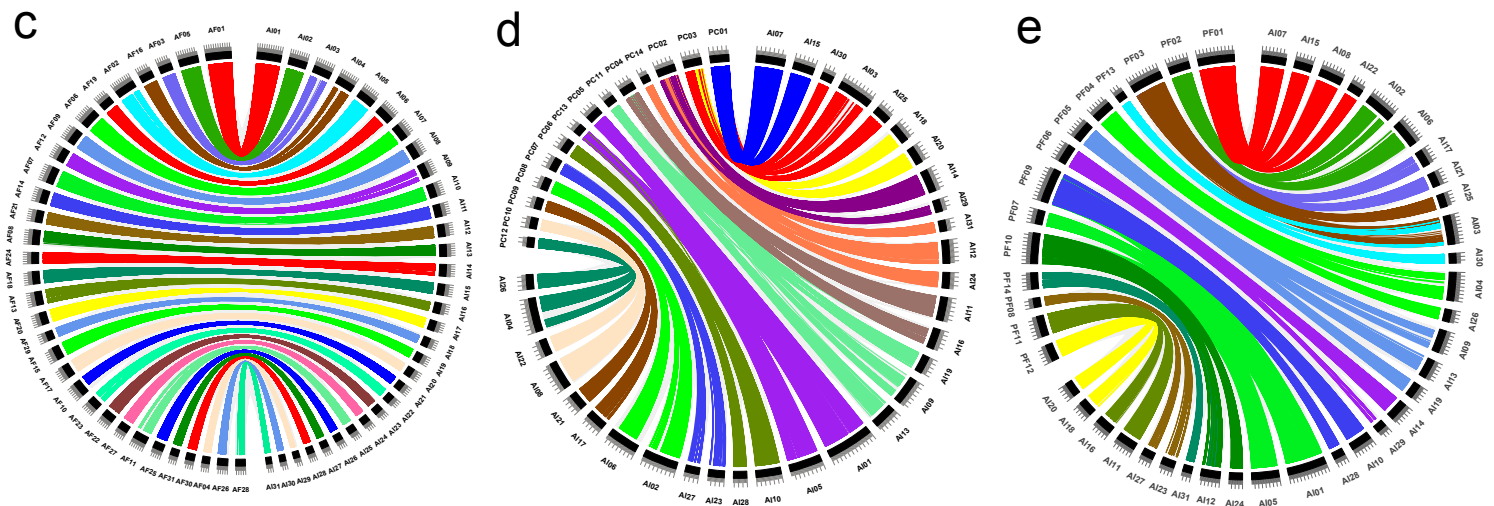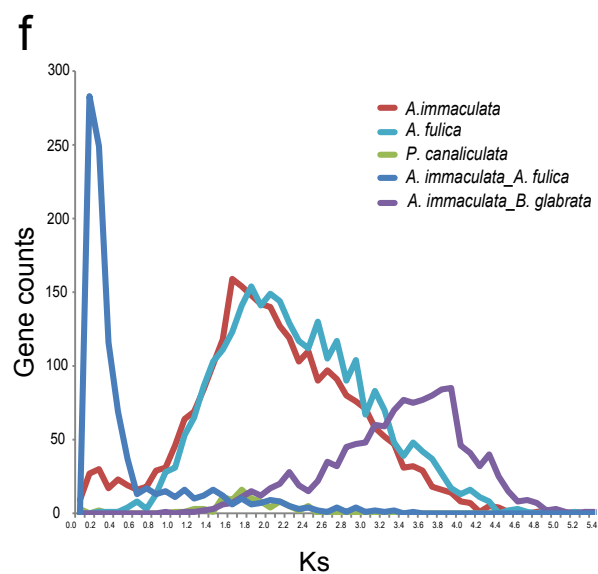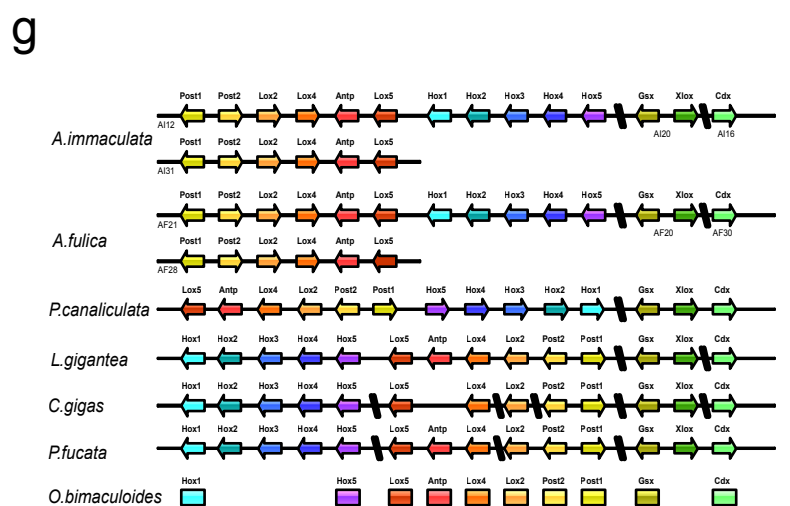

**a** *A. immaculata*  
 bioRxiv preprint doi: <https://doi.org/10.1101/2020.02.02.930693>; this version posted February 3, 2020. The copyright holder for this preprint (which was not certified by peer review) is the author/funder. All rights reserved. No reuse allowed without permission.

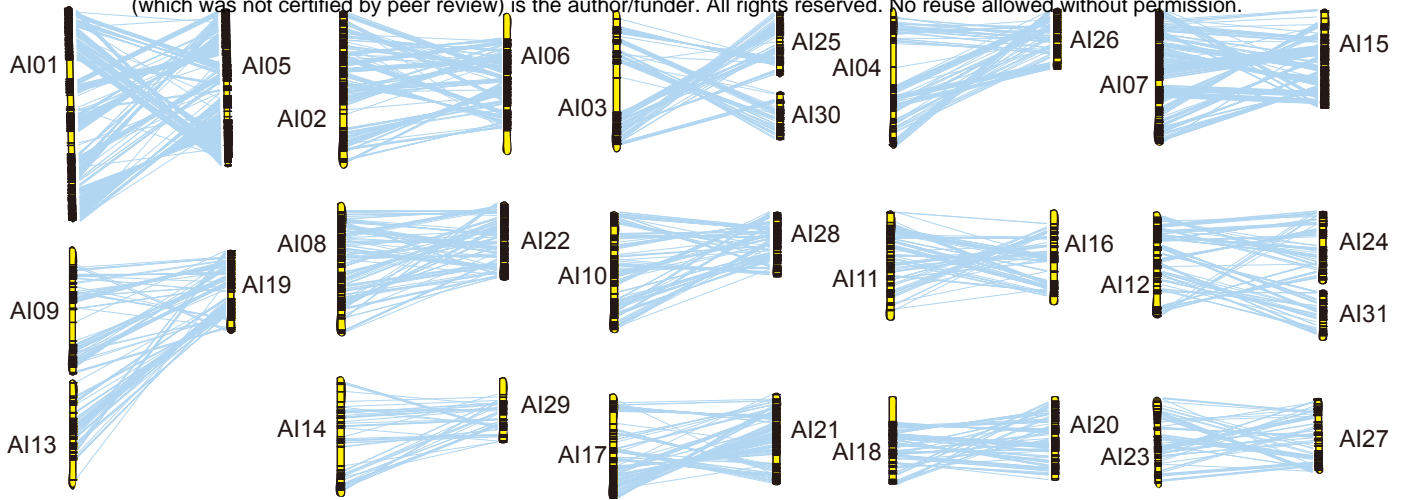

**b** *A. fulica*

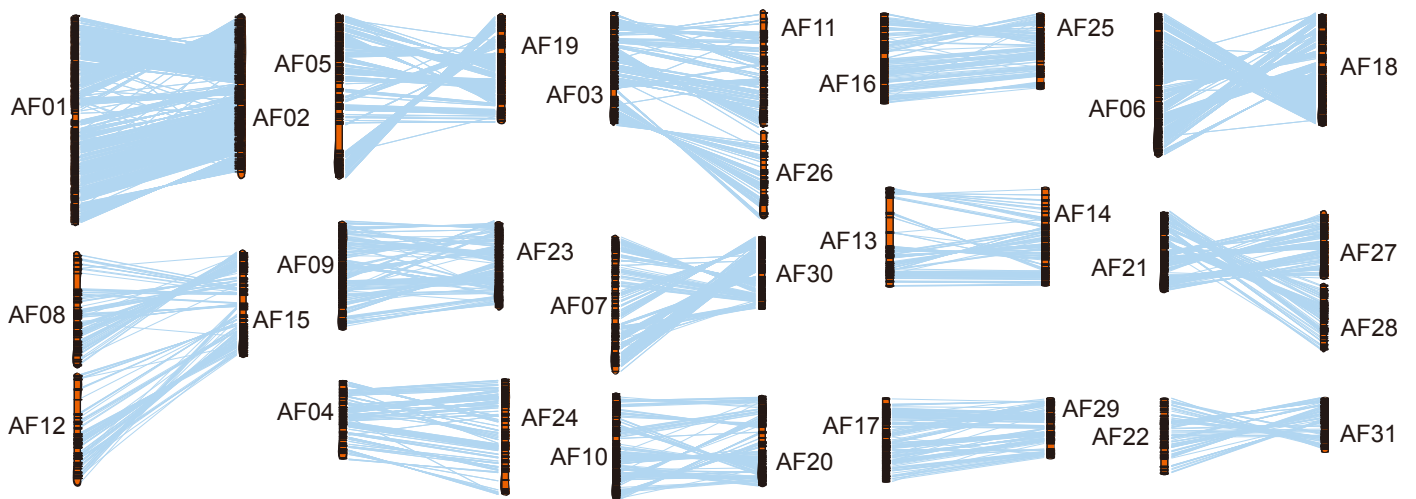

**c**

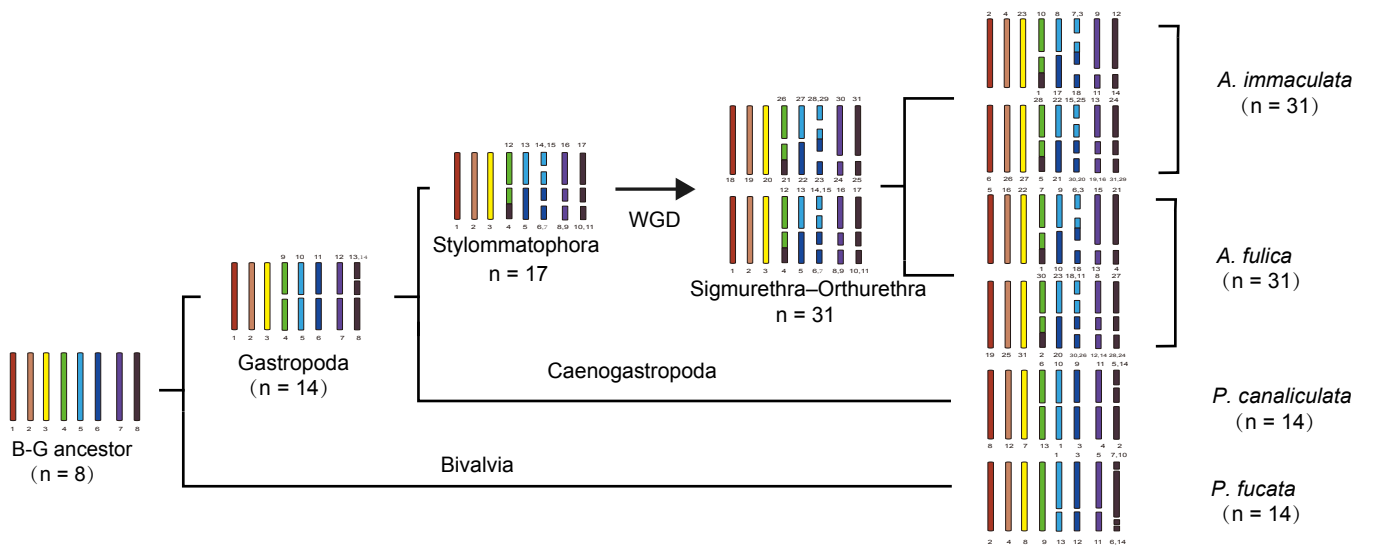

**a**

bioRxiv preprint doi: <https://doi.org/10.1101/2020.02.02.930693>; this version posted February 3, 2020. The copyright holder for this preprint (which was not certified by peer review) is the author/funder. All rights reserved. No reuse allowed without permission.

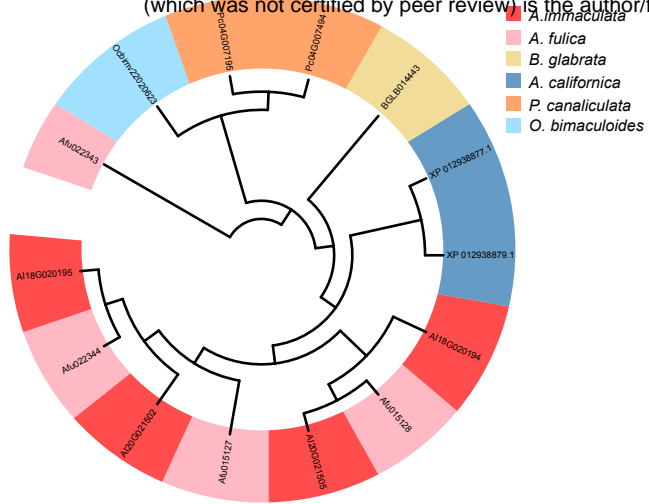**b**

bioRxiv preprint doi: <https://doi.org/10.1101/2020.02.02.930693>; this version posted February 3, 2020. The copyright holder for this preprint (which was not certified by peer review) is the author/funder. All rights reserved. No reuse allowed without permission.

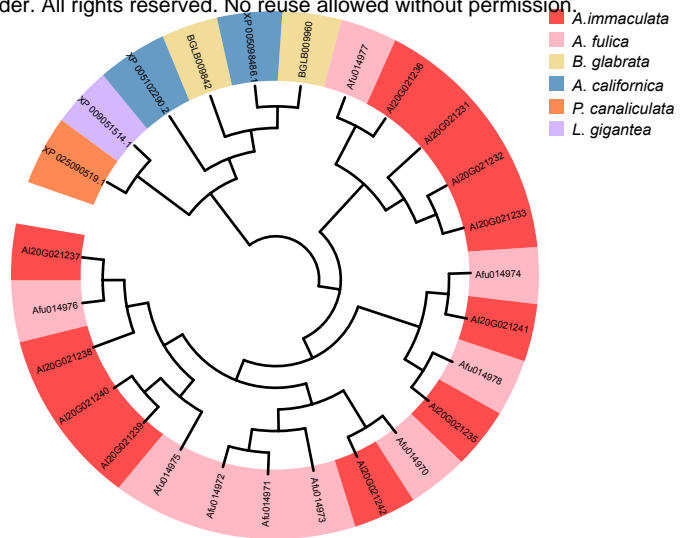**c**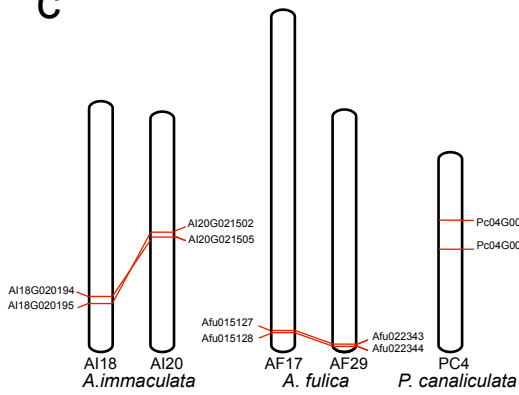**d**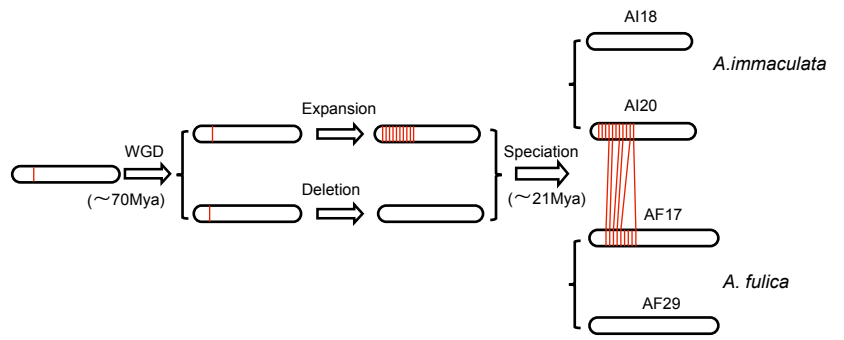

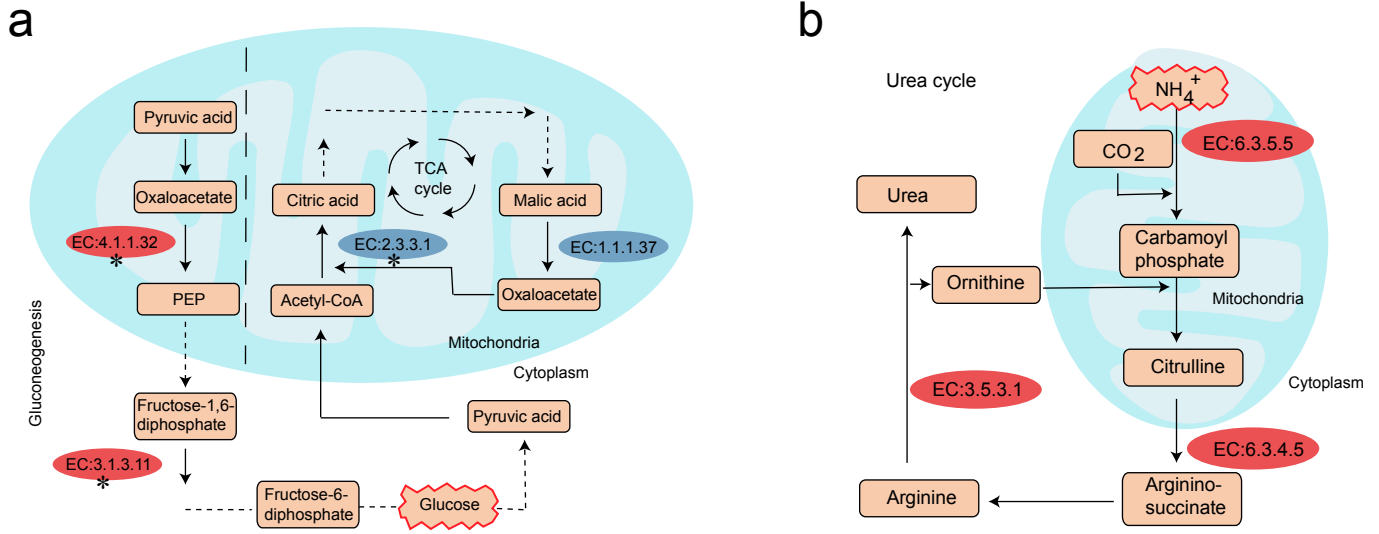

a

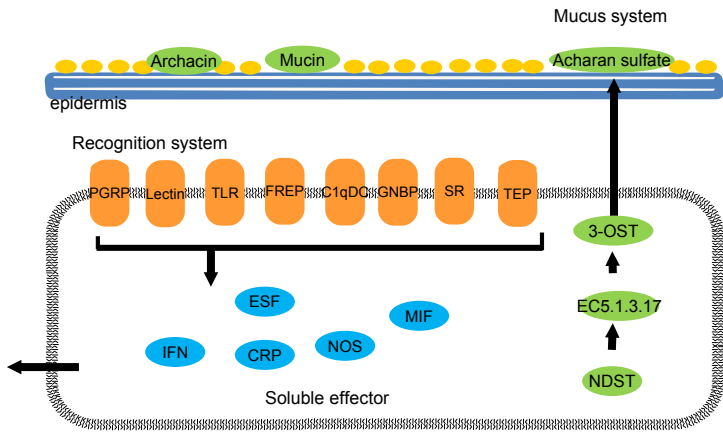

b

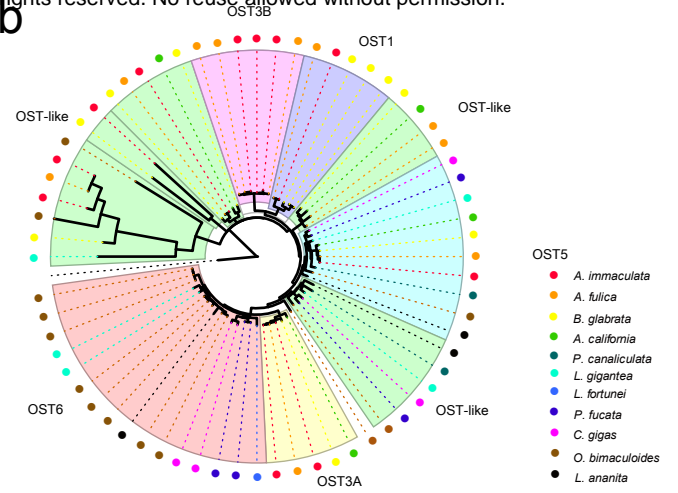

Source: https://www.biorxiv.org/content/10.1101/2020.02.02.930693v1.full.pdf
